# Supplementary material for: AXL Targeting Overcomes Human Lung Cancer Cell Resistance to NK- and CTL-Mediated Cytotoxicity
Source: Oxford University Press journal article supplement (doi:10.1158/2326-6066.cir-18-0903), 2019-09-05
Supplement: 23266066cir180903-sup-213879_2_supp_5745592_px256w.xlsx [file 23266066cir180903-sup-213879_2_supp_5745592_px256w.xlsx]

## Sheet: MES C30 treated vs vehicle
feature.ID	GeneSymbol	Description	Chr	Ratio	FC	Adj.P.value
NM_001611	ACP5	Homo sapiens acid phosphatase 5, tartrate resistant (ACP5), transcript variant 4, mRNA [NM_001611]	chr19	15.19	15.19	2.526e-15
NM_001042483	NUPR1	Homo sapiens nuclear protein, transcriptional regulator, 1 (NUPR1), transcript variant 1, mRNA [NM_001042483]	chr16	5.833	5.833	2.383e-10
NM_003820	TNFRSF14	Homo sapiens tumor necrosis factor receptor superfamily, member 14 (TNFRSF14), mRNA [NM_003820]	chr1	4.752	4.752	2.963e-09
NM_021158	TRIB3	Homo sapiens tribbles homolog 3 (Drosophila) (TRIB3), mRNA [NM_021158]	chr20	5.223	5.223	2.963e-09
NM_002306	LGALS3	Homo sapiens lectin, galactoside-binding, soluble, 3 (LGALS3), transcript variant 1, mRNA [NM_002306]	chr14	3.353	3.353	3.130e-09
THC2568453	XLOC_l2_014504	HUMTS11 ts11 cell cycle control protein {Homo sapiens} (exp=-1; wgp=0; cg=0), partial (34%) [THC2568453]	unmapped	3.363	3.363	3.971e-09
NM_201649	SLC6A9	Homo sapiens solute carrier family 6 (neurotransmitter transporter, glycine), member 9 (SLC6A9), transcript variant 2, mRNA [NM_201649]	chr1	6.41	6.41	4.324e-09
AK094730	LOC283454	Homo sapiens cDNA FLJ37411 fis, clone BRAMY2028682. [AK094730]	chr12	4.082	4.082	4.324e-09
NM_001244008	KIF1A	Homo sapiens kinesin family member 1A (KIF1A), transcript variant 1, mRNA [NM_001244008]	chr2	5.676	5.676	4.324e-09
NM_024111	CHAC1	Homo sapiens ChaC, cation transport regulator homolog 1 (E. coli) (CHAC1), transcript variant 1, mRNA [NM_024111]	chr15	6.859	6.859	4.362e-09
NM_015364	LY96	Homo sapiens lymphocyte antigen 96 (LY96), transcript variant 1, mRNA [NM_015364]	chr8	5.011	5.011	7.338e-09
NM_000050	ASS1	Homo sapiens argininosuccinate synthase 1 (ASS1), transcript variant 1, mRNA [NM_000050]	chr9	3.473	3.473	9.876e-09
NM_019058	DDIT4	Homo sapiens DNA-damage-inducible transcript 4 (DDIT4), mRNA [NM_019058]	chr10	3.907	3.907	9.876e-09
NM_003806	HRK	Homo sapiens harakiri, BCL2 interacting protein (contains only BH3 domain) (HRK), mRNA [NM_003806]	chr12	3.649	3.649	9.876e-09
NM_004083	DDIT3	Homo sapiens DNA-damage-inducible transcript 3 (DDIT3), transcript variant 5, mRNA [NM_004083]	chr12	3.502	3.502	1.078e-08
NM_032432	ABLIM2	Homo sapiens actin binding LIM protein family, member 2 (ABLIM2), transcript variant 6, mRNA [NM_032432]	chr4	3.049	3.049	1.375e-08
NM_006552	SCGB1D1	Homo sapiens secretoglobin, family 1D, member 1 (SCGB1D1), mRNA [NM_006552]	chr11	3.968	3.968	1.417e-08
NM_007030	TPPP	Homo sapiens tubulin polymerization promoting protein (TPPP), mRNA [NM_007030]	chr5	3.349	3.349	1.643e-08
NM_024866	ADM2	Homo sapiens adrenomedullin 2 (ADM2), mRNA [NM_024866]	chr22	4.829	4.829	2.054e-08
NM_001099	ACPP	Homo sapiens acid phosphatase, prostate (ACPP), transcript variant 1, mRNA [NM_001099]	chr3	0.264	-3.783	2.054e-08
NM_000148	FUT1	Homo sapiens fucosyltransferase 1 (galactoside 2-alpha-L-fucosyltransferase, H blood group) (FUT1), mRNA [NM_000148]	chr19	3.061	3.061	2.054e-08
NM_170744	UNC5B	Homo sapiens unc-5 homolog B (C. elegans) (UNC5B), transcript variant 1, mRNA [NM_170744]	chr10	4.432	4.432	2.594e-08
NM_001168399	BEX2	Homo sapiens brain expressed X-linked 2 (BEX2), transcript variant 1, mRNA [NM_001168399]	chrX	3.739	3.739	2.594e-08
NR_026796	C14orf34	Homo sapiens chromosome 14 open reading frame 34 (C14orf34), transcript variant 1, non-coding RNA [NR_026796]	chr14	3.458	3.458	2.939e-08
NM_000041	APOE	Homo sapiens apolipoprotein E (APOE), mRNA [NM_000041]	chr19	3.645	3.645	3.649e-08
NM_022449	RAB17	Homo sapiens RAB17, member RAS oncogene family (RAB17), transcript variant 1, mRNA [NM_022449]	chr2	2.893	2.893	4.068e-08
NM_016113	TRPV2	Homo sapiens transient receptor potential cation channel, subfamily V, member 2 (TRPV2), mRNA [NM_016113]	chr17	3.564	3.564	4.068e-08
NM_025218	ULBP1	Homo sapiens UL16 binding protein 1 (ULBP1), mRNA [NM_025218]	chr6	3.358	3.358	5.129e-08
NM_001004431	METRNL	Homo sapiens meteorin, glial cell differentiation regulator-like (METRNL), mRNA [NM_001004431]	chr17	3.28	3.28	5.383e-08
NM_001008540	CXCR4	Homo sapiens chemokine (C-X-C motif) receptor 4 (CXCR4), transcript variant 1, mRNA [NM_001008540]	chr2	0.346	-2.89	5.383e-08
NM_004563	PCK2	Homo sapiens phosphoenolpyruvate carboxykinase 2 (mitochondrial) (PCK2), nuclear gene encoding mitochondrial protein, transcript variant 1, mRNA [NM_004563]	chr14	4.812	4.812	5.383e-08
TCONS_l2_00028188	XLOC_l2_014504	BROAD Institute lincRNA (XLOC_l2_014504), lincRNA [TCONS_l2_00028188]	chr8	3.414	3.414	5.383e-08
NM_001008211	OPTN	Homo sapiens optineurin (OPTN), transcript variant 1, mRNA [NM_001008211]	chr10	3.547	3.547	5.383e-08
NM_001275	CHGA	Homo sapiens chromogranin A (parathyroid secretory protein 1) (CHGA), mRNA [NM_001275]	chr14	3.548	3.548	5.383e-08
NM_002284	KRT86	Homo sapiens keratin 86 (KRT86), mRNA [NM_002284]	chr12	3.267	3.267	6.096e-08
NM_052966	FAM129A	Homo sapiens family with sequence similarity 129, member A (FAM129A), transcript variant 2, mRNA [NM_052966]	chr1	4.031	4.031	6.670e-08
NM_001040058	SPP1	Homo sapiens secreted phosphoprotein 1 (SPP1), transcript variant 1, mRNA [NM_001040058]	chr4	4.027	4.027	7.304e-08
NM_002847	PTPRN2	Homo sapiens protein tyrosine phosphatase, receptor type, N polypeptide 2 (PTPRN2), transcript variant 1, mRNA [NM_002847]	chr7	2.922	2.922	7.304e-08
NM_000029	AGT	Homo sapiens angiotensinogen (serpin peptidase inhibitor, clade A, member 8) (AGT), mRNA [NM_000029]	chr1	2.809	2.809	7.304e-08
NM_017458	MVP	Homo sapiens major vault protein (MVP), transcript variant 1, mRNA [NM_017458]	chr16	3.435	3.435	9.359e-08
NM_001082575	RBFOX3	Homo sapiens RNA binding protein, fox-1 homolog (C. elegans) 3 (RBFOX3), mRNA [NM_001082575]	chr17	3.366	3.366	9.359e-08
NM_006206	PDGFRA	Homo sapiens platelet-derived growth factor receptor, alpha polypeptide (PDGFRA), mRNA [NM_006206]	chr4	0.297	-3.365	1.003e-07
NM_001033113	ENTPD8	Homo sapiens ectonucleoside triphosphate diphosphohydrolase 8 (ENTPD8), transcript variant 1, mRNA [NM_001033113]	chr9	3.455	3.455	1.003e-07
NM_003842	TNFRSF10B	Homo sapiens tumor necrosis factor receptor superfamily, member 10b (TNFRSF10B), transcript variant 1, mRNA [NM_003842]	chr8	2.565	2.565	1.137e-07
NM_002201	ISG20	Homo sapiens interferon stimulated exonuclease gene 20kDa (ISG20), mRNA [NM_002201]	chr15	2.696	2.696	1.242e-07
NM_000434	NEU1	Homo sapiens sialidase 1 (lysosomal sialidase) (NEU1), mRNA [NM_000434]	chr6	2.313	2.313	1.501e-07
NM_013282	UHRF1	Homo sapiens ubiquitin-like with PHD and ring finger domains 1 (UHRF1), transcript variant 2, mRNA [NM_013282]	chr19	0.467	-2.143	1.615e-07
NR_030732	LOC645638	Homo sapiens WDNM1-like pseudogene (LOC645638), non-coding RNA [NR_030732]	chr17	3.387	3.387	1.622e-07
NM_006373	VAT1	Homo sapiens vesicle amine transport protein 1 homolog (T. californica) (VAT1), mRNA [NM_006373]	chr17	3.047	3.047	1.824e-07
NM_001135219	PIP5KL1	Homo sapiens phosphatidylinositol-4-phosphate 5-kinase-like 1 (PIP5KL1), transcript variant 1, mRNA [NM_001135219]	chr9	2.89	2.89	1.824e-07
NM_016651	DACT1	Homo sapiens dapper, antagonist of beta-catenin, homolog 1 (Xenopus laevis) (DACT1), transcript variant 1, mRNA [NM_016651]	chr14	0.396	-2.526	2.226e-07
TCONS_l2_00027739	XLOC_l2_014191	BROAD Institute lincRNA (XLOC_l2_014191), lincRNA [TCONS_l2_00027739]	chr8	4.366	4.366	2.226e-07
NM_003568	ANXA9	Homo sapiens annexin A9 (ANXA9), mRNA [NM_003568]	chr1	2.545	2.545	2.374e-07
NM_001011709	PNLIPRP3	Homo sapiens pancreatic lipase-related protein 3 (PNLIPRP3), mRNA [NM_001011709]	chr10	3.579	3.579	2.409e-07
NM_003190	TAPBP	Homo sapiens TAP binding protein (tapasin) (TAPBP), transcript variant 1, mRNA [NM_003190]	chr6	2.455	2.455	2.413e-07
NM_002089	CXCL2	Homo sapiens chemokine (C-X-C motif) ligand 2 (CXCL2), mRNA [NM_002089]	chr4	2.678	2.678	2.413e-07
NM_006399	BATF	Homo sapiens basic leucine zipper transcription factor, ATF-like (BATF), mRNA [NM_006399]	chr14	3.353	3.353	2.442e-07
NM_018357	LARP6	Homo sapiens La ribonucleoprotein domain family, member 6 (LARP6), transcript variant 1, mRNA [NM_018357]	chr15	2.443	2.443	2.442e-07
NM_006551	SCGB1D2	Homo sapiens secretoglobin, family 1D, member 2 (SCGB1D2), mRNA [NM_006551]	chr11	3.55	3.55	2.494e-07
NM_001018111	PODXL	Homo sapiens podocalyxin-like (PODXL), transcript variant 1, mRNA [NM_001018111]	chr7	0.428	-2.338	2.494e-07
A_24_P178444	A_24_P178444	Unknown	chr11	3.13	3.13	2.645e-07
NM_003383	VLDLR	Homo sapiens very low density lipoprotein receptor (VLDLR), transcript variant 1, mRNA [NM_003383]	chr9	2.52	2.52	3.067e-07
NM_198949	NUDT1	Homo sapiens nudix (nucleoside diphosphate linked moiety X)-type motif 1 (NUDT1), transcript variant 2B, mRNA [NM_198949]	chr7	0.464	-2.153	3.172e-07
NM_002692	POLE2	Homo sapiens polymerase (DNA directed), epsilon 2 (p59 subunit) (POLE2), transcript variant 1, mRNA [NM_002692]	chr14	0.425	-2.353	3.245e-07
NM_001005340	GPNMB	Homo sapiens glycoprotein (transmembrane) nmb (GPNMB), transcript variant 1, mRNA [NM_001005340]	chr7	3.002	3.002	3.997e-07
XR_112106	LOC284561	PREDICTED: Homo sapiens hypothetical LOC284561 (LOC284561), miscRNA [XR_112106]	chr1	3.174	3.174	4.053e-07
NM_014298	QPRT	Homo sapiens quinolinate phosphoribosyltransferase (QPRT), mRNA [NM_014298]	chr16	2.757	2.757	4.310e-07
NM_001142620	STRA6	Homo sapiens stimulated by retinoic acid gene 6 homolog (mouse) (STRA6), transcript variant 5, mRNA [NM_001142620]	chr15	0.417	-2.4	4.329e-07
AK023806	FLJ13744	Homo sapiens cDNA FLJ13744 fis, clone PLACE3000230. [AK023806]	chr6	3.155	3.155	4.329e-07
NM_024101	MLPH	Homo sapiens melanophilin (MLPH), transcript variant 1, mRNA [NM_024101]	chr2	2.897	2.897	4.630e-07
THC2682885	THC2682885	Q6BEA3_RAT (Q6BEA3) WDNM1 homolog, partial (33%) [THC2682885]	unmapped	2.985	2.985	4.664e-07
NM_000954	PTGDS	Homo sapiens prostaglandin D2 synthase 21kDa (brain) (PTGDS), mRNA [NM_000954]	chr9	3.529	3.529	4.911e-07
NM_021018	HIST1H3F	Homo sapiens histone cluster 1, H3f (HIST1H3F), mRNA [NM_021018]	chr6	0.444	-2.25	4.911e-07
NM_001005464	HIST2H3A	Homo sapiens histone cluster 2, H3a (HIST2H3A), mRNA [NM_001005464]	chr1	0.397	-2.519	4.911e-07
NM_003378	VGF	Homo sapiens VGF nerve growth factor inducible (VGF), mRNA [NM_003378]	chr7	2.371	2.371	5.026e-07
NM_017983	WIPI1	Homo sapiens WD repeat domain, phosphoinositide interacting 1 (WIPI1), mRNA [NM_017983]	chr17	2.816	2.816	5.693e-07
NM_197958	LARP6	Homo sapiens La ribonucleoprotein domain family, member 6 (LARP6), transcript variant 2, mRNA [NM_197958]	chr15	2.122	2.122	5.693e-07
NM_003714	STC2	Homo sapiens stanniocalcin 2 (STC2), mRNA [NM_003714]	chr5	3.235	3.235	6.298e-07
NM_001673	ASNS	Homo sapiens asparagine synthetase (glutamine-hydrolyzing) (ASNS), transcript variant 2, mRNA [NM_001673]	chr7	2.945	2.945	6.335e-07
NM_003530	HIST1H3D	Homo sapiens histone cluster 1, H3d (HIST1H3D), mRNA [NM_003530]	chr6	0.451	-2.22	6.355e-07
NM_033306	CASP4	Homo sapiens caspase 4, apoptosis-related cysteine peptidase (CASP4), transcript variant gamma, mRNA [NM_033306]	chr11	2.356	2.356	6.401e-07
NM_201525	GPR56	Homo sapiens G protein-coupled receptor 56 (GPR56), transcript variant 3, mRNA [NM_201525]	chr16	3.107	3.107	6.467e-07
NM_001130083	ABLIM2	Homo sapiens actin binding LIM protein family, member 2 (ABLIM2), transcript variant 1, mRNA [NM_001130083]	chr4	2.5	2.5	6.467e-07
NM_003900	SQSTM1	Homo sapiens sequestosome 1 (SQSTM1), transcript variant 1, mRNA [NM_003900]	chr5	2.1	2.1	6.780e-07
NM_001080494	TTC39A	Homo sapiens tetratricopeptide repeat domain 39A (TTC39A), transcript variant 2, mRNA [NM_001080494]	chr1	2.985	2.985	6.861e-07
NM_006169	NNMT	Homo sapiens nicotinamide N-methyltransferase (NNMT), mRNA [NM_006169]	chr11	3	3	8.676e-07
NM_032995	ARHGEF4	Homo sapiens Rho guanine nucleotide exchange factor (GEF) 4 (ARHGEF4), transcript variant 2, mRNA [NM_032995]	chr2	2.273	2.273	9.270e-07
NM_031479	INHBE	Homo sapiens inhibin, beta E (INHBE), mRNA [NM_031479]	chr12	4.592	4.592	9.270e-07
BX088681	XLOC_005564	BX088681 Soares_testis_NHT Homo sapiens cDNA clone IMAGp998F233332, mRNA sequence [BX088681]	chr6	4.694	4.694	9.270e-07
NM_005194	CEBPB	Homo sapiens CCAAT/enhancer binding protein (C/EBP), beta (CEBPB), mRNA [NM_005194]	chr20	2.132	2.132	9.270e-07
NM_032637	SKP2	Homo sapiens S-phase kinase-associated protein 2 (p45) (SKP2), transcript variant 2, mRNA [NM_032637]	chr5	0.428	-2.336	9.479e-07
NR_045116	C5orf56	Homo sapiens chromosome 5 open reading frame 56 (C5orf56), non-coding RNA [NR_045116]	chr5	2.223	2.223	9.556e-07
NM_004184	WARS	Homo sapiens tryptophanyl-tRNA synthetase (WARS), transcript variant 1, mRNA [NM_004184]	chr14	2.851	2.851	9.620e-07
NM_016270	KLF2	Homo sapiens Kruppel-like factor 2 (lung) (KLF2), mRNA [NM_016270]	chr19	2.594	2.594	9.620e-07
NR_033856	FLJ43315	Homo sapiens asparagine synthetase pseudogene (FLJ43315), non-coding RNA [NR_033856]	chrUn_gl000211	2.777	2.777	1.037e-06
NM_004864	GDF15	Homo sapiens growth differentiation factor 15 (GDF15), mRNA [NM_004864]	chr19	2.337	2.337	1.037e-06
NM_001037335	PRIC285	Homo sapiens peroxisomal proliferator-activated receptor A interacting complex 285 (PRIC285), transcript variant 1, mRNA [NM_001037335]	chr20	2.594	2.594	1.079e-06
ENST00000438158	XLOC_001215	601566084F1 NIH_MGC_21 Homo sapiens cDNA clone IMAGE:3840837 5', mRNA sequence [BE735115]	chr1	3.448	3.448	1.113e-06
NM_001010917	GOLGA7B	Homo sapiens golgin A7 family, member B (GOLGA7B), mRNA [NM_001010917]	chr10	2.73	2.73	1.162e-06
NM_014641	MDC1	Homo sapiens mediator of DNA-damage checkpoint 1 (MDC1), mRNA [NM_014641]	chr6	0.456	-2.195	1.206e-06
AK027667	AK027667	Homo sapiens cDNA FLJ14761 fis, clone NT2RP3003302. [AK027667]	chr17_gl000205_random	0.401	-2.494	1.220e-06
NM_017709	FAM46C	Homo sapiens family with sequence similarity 46, member C (FAM46C), mRNA [NM_017709]	chr1	0.438	-2.283	1.223e-06
AK094188	LOC148189	Homo sapiens cDNA FLJ36869 fis, clone ASTRO2016819. [AK094188]	chr19	2.385	2.385	1.226e-06
NM_031459	SESN2	Homo sapiens sestrin 2 (SESN2), mRNA [NM_031459]	chr1	2.927	2.927	1.226e-06
NM_016639	TNFRSF12A	Homo sapiens tumor necrosis factor receptor superfamily, member 12A (TNFRSF12A), mRNA [NM_016639]	chr16	2.366	2.366	1.230e-06
NM_004091	E2F2	Homo sapiens E2F transcription factor 2 (E2F2), mRNA [NM_004091]	chr1	0.496	-2.016	1.230e-06
NM_001126106	SLC7A7	Homo sapiens solute carrier family 7 (amino acid transporter light chain, y+L system), member 7 (SLC7A7), transcript variant 3, mRNA [NM_001126106]	chr14	2.538	2.538	1.392e-06
NM_003504	CDC45	Homo sapiens cell division cycle 45 homolog (S. cerevisiae) (CDC45), transcript variant 2, mRNA [NM_003504]	chr22	0.482	-2.074	1.433e-06
NM_001005291	SREBF1	Homo sapiens sterol regulatory element binding transcription factor 1 (SREBF1), transcript variant 1, mRNA [NM_001005291]	chr17	2.084	2.084	1.433e-06
NM_176875	CCKBR	Homo sapiens cholecystokinin B receptor (CCKBR), mRNA [NM_176875]	chr11	0.355	-2.815	1.498e-06
NM_025163	PIGZ	Homo sapiens phosphatidylinositol glycan anchor biosynthesis, class Z (PIGZ), mRNA [NM_025163]	chr3	2.168	2.168	1.510e-06
NM_004055	CAPN5	Homo sapiens calpain 5 (CAPN5), mRNA [NM_004055]	chr11	2.262	2.262	1.670e-06
NM_005869	CWC27	Homo sapiens CWC27 spliceosome-associated protein homolog (S. cerevisiae) (CWC27), mRNA [NM_005869]	chr5	0.272	-3.679	1.682e-06
AK094436	LOC284219	Homo sapiens cDNA FLJ37117 fis, clone BRACE2022270. [AK094436]	chr18	0.401	-2.494	1.682e-06
NM_001701	BAAT	Homo sapiens bile acid CoA: amino acid N-acyltransferase (glycine N-choloyltransferase) (BAAT), transcript variant 1, mRNA [NM_001701]	chr9	2.927	2.927	1.811e-06
NM_012435	SHC2	Homo sapiens SHC (Src homology 2 domain containing) transforming protein 2 (SHC2), mRNA [NM_012435]	chr19	2.72	2.72	1.939e-06
NM_181711	GRASP	Homo sapiens GRP1 (general receptor for phosphoinositides 1)-associated scaffold protein (GRASP), mRNA [NM_181711]	chr12	2.839	2.839	2.290e-06
NM_001145033	C11orf96	Homo sapiens chromosome 11 open reading frame 96 (C11orf96), mRNA [NM_001145033]	chr11	2.474	2.474	2.413e-06
NM_031942	CDCA7	Homo sapiens cell division cycle associated 7 (CDCA7), transcript variant 1, mRNA [NM_031942]	chr2	0.451	-2.217	2.413e-06
NM_199054	MKNK2	Homo sapiens MAP kinase interacting serine/threonine kinase 2 (MKNK2), transcript variant 2, mRNA [NM_199054]	chr19	2.402	2.402	2.594e-06
NM_021244	RRAGD	Homo sapiens Ras-related GTP binding D (RRAGD), mRNA [NM_021244]	chr6	2.425	2.425	2.653e-06
BC084573	XLOC_012452	GRP1_PHAVU (P10495) Glycine-rich cell wall structural protein 1.0 precursor (GRP 1.0), partial (18%) [THC2614283]	chr17	0.482	-2.073	2.653e-06
NM_000475	NR0B1	Homo sapiens nuclear receptor subfamily 0, group B, member 1 (NR0B1), mRNA [NM_000475]	chrX	2.456	2.456	2.687e-06
NM_005883	APC2	Homo sapiens adenomatosis polyposis coli 2 (APC2), mRNA [NM_005883]	chr19	2.544	2.544	2.687e-06
NM_012450	SLC13A4	Homo sapiens solute carrier family 13 (sodium/sulfate symporters), member 4 (SLC13A4), mRNA [NM_012450]	chr7	0.347	-2.886	2.884e-06
NM_000527	LDLR	Homo sapiens low density lipoprotein receptor (LDLR), transcript variant 1, mRNA [NM_000527]	chr19	2.246	2.246	3.076e-06
NM_004031	IRF7	Homo sapiens interferon regulatory factor 7 (IRF7), transcript variant d, mRNA [NM_004031]	chr11	2.477	2.477	3.116e-06
NM_000135	FANCA	Homo sapiens Fanconi anemia, complementation group A (FANCA), transcript variant 1, mRNA [NM_000135]	chr16	0.484	-2.068	3.222e-06
AK075287	SPC24	Homo sapiens cDNA FLJ90806 fis, clone Y79AA1000750. [AK075287]	chr19	0.456	-2.195	3.284e-06
NM_021064	HIST1H2AG	Homo sapiens histone cluster 1, H2ag (HIST1H2AG), mRNA [NM_021064]	chr6	0.369	-2.711	3.343e-06
NM_005322	HIST1H1B	Homo sapiens histone cluster 1, H1b (HIST1H1B), mRNA [NM_005322]	chr6	0.413	-2.421	3.371e-06
NM_014368	LHX6	Homo sapiens LIM homeobox 6 (LHX6), transcript variant 1, mRNA [NM_014368]	chr9	0.475	-2.103	3.441e-06
NR_004383	SNAR-G1	Homo sapiens small ILF3/NF90-associated RNA G1 (SNAR-G1), small nuclear RNA [NR_004383]	chr19	0.467	-2.141	3.490e-06
A_33_P3416414	A_33_P3416414	Unknown	chr8	2.175	2.175	3.542e-06
NM_017712	PGPEP1	Homo sapiens pyroglutamyl-peptidase I (PGPEP1), mRNA [NM_017712]	chr19	2.051	2.051	3.542e-06
NM_020311	CXCR7	Homo sapiens chemokine (C-X-C motif) receptor 7 (CXCR7), mRNA [NM_020311]	chr2	0.412	-2.425	3.736e-06
NR_037597	LOC442028	Homo sapiens uncharacterized LOC442028 (LOC442028), non-coding RNA [NR_037597]	chr2	2.862	2.862	3.749e-06
NM_016095	GINS2	Homo sapiens GINS complex subunit 2 (Psf2 homolog) (GINS2), mRNA [NM_016095]	chr16	0.422	-2.371	3.881e-06
NM_032997	ZWINT	Homo sapiens ZW10 interactor (ZWINT), transcript variant 2, mRNA [NM_032997]	chr10	0.424	-2.358	3.887e-06
NM_015379	BRI3	Homo sapiens brain protein I3 (BRI3), transcript variant 1, mRNA [NM_015379]	chr7	2.037	2.037	3.887e-06
NM_001012410	SGOL1	Homo sapiens shugoshin-like 1 (S. pombe) (SGOL1), transcript variant A2, mRNA [NM_001012410]	chr3	0.456	-2.194	3.919e-06
NM_004696	SLC16A4	Homo sapiens solute carrier family 16, member 4 (monocarboxylic acid transporter 5) (SLC16A4), transcript variant 1, mRNA [NM_004696]	chr1	2.721	2.721	4.001e-06
NM_001034077	HIST2H4B	Homo sapiens histone cluster 2, H4b (HIST2H4B), mRNA [NM_001034077]	chr1	0.435	-2.299	4.025e-06
ENST00000289352	LOC100507025	PREDICTED: Homo sapiens hypothetical LOC100507025 (LOC100507025), miscRNA [XR_108687]	chr6	2.454	2.454	4.025e-06
NM_000187	HGD	Homo sapiens homogentisate 1,2-dioxygenase (HGD), mRNA [NM_000187]	chr3	2.257	2.257	4.643e-06
NM_182507	KRT80	Homo sapiens keratin 80 (KRT80), transcript variant 1, mRNA [NM_182507]	chr12	2.513	2.513	4.643e-06
NM_001001995	GPM6B	Homo sapiens glycoprotein M6B (GPM6B), transcript variant 1, mRNA [NM_001001995]	chrX	0.47	-2.126	4.669e-06
NM_203411	TMEM88	Homo sapiens transmembrane protein 88 (TMEM88), mRNA [NM_203411]	chr17	2.381	2.381	4.861e-06
NM_198253	TERT	Homo sapiens telomerase reverse transcriptase (TERT), transcript variant 1, mRNA [NM_198253]	chr5	0.467	-2.142	4.941e-06
NM_025049	PIF1	Homo sapiens PIF1 5'-to-3' DNA helicase homolog (S. cerevisiae) (PIF1), mRNA [NM_025049]	chr15	0.487	-2.053	5.541e-06
NM_005980	S100P	Homo sapiens S100 calcium binding protein P (S100P), mRNA [NM_005980]	chr4	2.274	2.274	5.582e-06
NM_022359	PDE4DIP	Homo sapiens phosphodiesterase 4D interacting protein (PDE4DIP), transcript variant 3, mRNA [NM_022359]	chr1	0.422	-2.368	5.659e-06
NM_001040619	ATF3	Homo sapiens activating transcription factor 3 (ATF3), transcript variant 4, mRNA [NM_001040619]	chr1	2.254	2.254	5.665e-06
NM_018154	ASF1B	Homo sapiens ASF1 anti-silencing function 1 homolog B (S. cerevisiae) (ASF1B), mRNA [NM_018154]	chr19	0.421	-2.377	5.665e-06
NM_001844	COL2A1	Homo sapiens collagen, type II, alpha 1 (COL2A1), transcript variant 1, mRNA [NM_001844]	chr12	0.417	-2.397	5.818e-06
NM_030971	SFXN3	Homo sapiens sideroflexin 3 (SFXN3), mRNA [NM_030971]	chr10	2.042	2.042	5.818e-06
NM_004390	CTSH	Homo sapiens cathepsin H (CTSH), mRNA [NM_004390]	chr15	2.074	2.074	5.922e-06
BC021569	LOC254896	Homo sapiens hypothetical protein MGC31957, mRNA (cDNA clone MGC:31957 IMAGE:3959651), complete cds. [BC021569]	chr8	2.147	2.147	5.941e-06
NM_003537	HIST1H3B	Homo sapiens histone cluster 1, H3b (HIST1H3B), mRNA [NM_003537]	chr6	0.441	-2.267	5.949e-06
NM_003122	SPINK1	Homo sapiens serine peptidase inhibitor, Kazal type 1 (SPINK1), mRNA [NM_003122]	chr5	2.828	2.828	6.286e-06
NM_181578	RFC5	Homo sapiens replication factor C (activator 1) 5, 36.5kDa (RFC5), transcript variant 2, mRNA [NM_181578]	chr12	0.493	-2.027	6.330e-06
NR_040111	LOC100505782	Homo sapiens uncharacterized LOC100505782 (LOC100505782), non-coding RNA [NR_040111]	chr17	0.377	-2.653	6.378e-06
NM_139314	ANGPTL4	Homo sapiens angiopoietin-like 4 (ANGPTL4), transcript variant 1, mRNA [NM_139314]	chr19	2.396	2.396	6.545e-06
NM_001032283	TMPO	Homo sapiens thymopoietin (TMPO), transcript variant 2, mRNA [NM_001032283]	chr12	0.457	-2.19	6.545e-06
NR_004407	RNU11	Homo sapiens RNA, U11 small nuclear (RNU11), small nuclear RNA [NR_004407]	chr1	0.474	-2.111	6.656e-06
ENST00000487412	STARD13	StAR-related lipid transfer (START) domain containing 13 [Source:HGNC Symbol;Acc:19164] [ENST00000487412]	chr13	0.361	-2.772	6.990e-06
NR_002912	SNORA67	Homo sapiens small nucleolar RNA, H/ACA box 67 (SNORA67), small nucleolar RNA [NR_002912]	chr17	0.473	-2.113	7.065e-06
NM_002534	OAS1	Homo sapiens 2'-5'-oligoadenylate synthetase 1, 40/46kDa (OAS1), transcript variant 2, mRNA [NM_002534]	chr12	2.201	2.201	7.129e-06
NM_002198	IRF1	Homo sapiens interferon regulatory factor 1 (IRF1), mRNA [NM_002198]	chr5	2.032	2.032	7.160e-06
NM_019601	SUSD2	Homo sapiens sushi domain containing 2 (SUSD2), mRNA [NM_019601]	chr22	2.394	2.394	7.245e-06
BC033389	MGC39584	Q8NCQ8_HUMAN (Q8NCQ8) MGC39584 protein, partial (48%) [THC2614371]	chr4_gl000193_random	2.205	2.205	7.310e-06
NM_174936	PCSK9	Homo sapiens proprotein convertase subtilisin/kexin type 9 (PCSK9), mRNA [NM_174936]	chr1	2.297	2.297	7.734e-06
NM_001163724	LOC388588	Homo sapiens uncharacterized LOC388588 (LOC388588), mRNA [NM_001163724]	chr1	2.046	2.046	7.815e-06
NM_000817	GAD1	Homo sapiens glutamate decarboxylase 1 (brain, 67kDa) (GAD1), transcript variant GAD67, mRNA [NM_000817]	chr2	0.465	-2.152	7.815e-06
NM_182776	MCM7	Homo sapiens minichromosome maintenance complex component 7 (MCM7), transcript variant 2, mRNA [NM_182776]	chr7	0.481	-2.081	7.815e-06
NM_202002	FOXM1	Homo sapiens forkhead box M1 (FOXM1), transcript variant 1, mRNA [NM_202002]	chr12	0.465	-2.151	8.003e-06
NM_001100913	PACS2	Homo sapiens phosphofurin acidic cluster sorting protein 2 (PACS2), transcript variant 1, mRNA [NM_001100913]	chr14	2.039	2.039	8.427e-06
NM_021992	TMSB15A	Homo sapiens thymosin beta 15a (TMSB15A), mRNA [NM_021992]	chrX	0.367	-2.721	8.605e-06
ENST00000450294	P39189	ALU2_HUMAN (P39189) Alu subfamily SB sequence contamination warning entry, partial (12%) [THC2660106]	chr2	2.691	2.691	8.668e-06
NM_006462	RBCK1	Homo sapiens RanBP-type and C3HC4-type zinc finger containing 1 (RBCK1), transcript variant 1, mRNA [NM_006462]	chr20	2.15	2.15	9.070e-06
NM_022131	CLSTN2	Homo sapiens calsyntenin 2 (CLSTN2), mRNA [NM_022131]	chr3	2.398	2.398	9.097e-06
NM_003511	HIST1H2AL	Homo sapiens histone cluster 1, H2al (HIST1H2AL), mRNA [NM_003511]	chr6	0.398	-2.51	9.279e-06
NM_006432	NPC2	Homo sapiens Niemann-Pick disease, type C2 (NPC2), mRNA [NM_006432]	chr14	2.115	2.115	9.320e-06
NM_005269	GLI1	Homo sapiens GLI family zinc finger 1 (GLI1), transcript variant 1, mRNA [NM_005269]	chr12	2.028	2.028	9.401e-06
NM_003155	STC1	Homo sapiens stanniocalcin 1 (STC1), mRNA [NM_003155]	chr8	0.342	-2.925	9.432e-06
NM_002216	ITIH2	Homo sapiens inter-alpha-trypsin inhibitor heavy chain 2 (ITIH2), mRNA [NM_002216]	chr10	0.463	-2.158	9.513e-06
NM_003579	RAD54L	Homo sapiens RAD54-like (S. cerevisiae) (RAD54L), transcript variant 1, mRNA [NM_003579]	chr1	0.499	-2.005	9.565e-06
NM_012445	SPON2	Homo sapiens spondin 2, extracellular matrix protein (SPON2), transcript variant 1, mRNA [NM_012445]	chr4	2.263	2.263	9.633e-06
TCONS_l2_00005178	XLOC_l2_002761	BROAD Institute lincRNA (XLOC_l2_002761), lincRNA [TCONS_l2_00005178]	chr11	2.291	2.291	9.881e-06
NM_001039535	SKA1	Homo sapiens spindle and kinetochore associated complex subunit 1 (SKA1), transcript variant 1, mRNA [NM_001039535]	chr18	0.472	-2.119	9.948e-06
NM_207309	UAP1L1	Homo sapiens UDP-N-acteylglucosamine pyrophosphorylase 1-like 1 (UAP1L1), mRNA [NM_207309]	chr9	2.651	2.651	1.029e-05
NM_001039651	C6orf26	Homo sapiens chromosome 6 open reading frame 26 (C6orf26), mRNA [NM_001039651]	chr6	0.454	-2.201	1.029e-05
NM_001789	CDC25A	Homo sapiens cell division cycle 25 homolog A (S. pombe) (CDC25A), transcript variant 1, mRNA [NM_001789]	chr3	0.47	-2.126	1.031e-05
NM_001164442	FAM159B	Homo sapiens family with sequence similarity 159, member B (FAM159B), mRNA [NM_001164442]	chr5	0.423	-2.362	1.042e-05
NM_001010858	RNF187	Homo sapiens ring finger protein 187 (RNF187), mRNA [NM_001010858]	chr1	2.181	2.181	1.054e-05
NM_003512	HIST1H2AC	Homo sapiens histone cluster 1, H2ac (HIST1H2AC), mRNA [NM_003512]	chr6	0.452	-2.213	1.066e-05
NM_001017424	KCNK2	Homo sapiens potassium channel, subfamily K, member 2 (KCNK2), transcript variant 1, mRNA [NM_001017424]	chr1	0.432	-2.316	1.123e-05
NM_018986	SH3TC1	Homo sapiens SH3 domain and tetratricopeptide repeats 1 (SH3TC1), mRNA [NM_018986]	chr4	2.004	2.004	1.123e-05
NM_014417	BBC3	Homo sapiens BCL2 binding component 3 (BBC3), transcript variant 4, mRNA [NM_014417]	chr19	2.236	2.236	1.259e-05
NM_015516	TSKU	Homo sapiens tsukushi small leucine rich proteoglycan homolog (Xenopus laevis) (TSKU), mRNA [NM_015516]	chr11	2.001	2.001	1.259e-05
NM_001170798	SLC15A5	Homo sapiens solute carrier family 15, member 5 (SLC15A5), mRNA [NM_001170798]	chr12	0.459	-2.178	1.259e-05
NM_001007271	DUSP13	Homo sapiens dual specificity phosphatase 13 (DUSP13), transcript variant 1, mRNA [NM_001007271]	chr10	2.416	2.416	1.273e-05
NR_024457	LOC100190940	Homo sapiens uncharacterized LOC100190940 (LOC100190940), non-coding RNA [NR_024457]	chr12	0.483	-2.069	1.297e-05
NM_130469	JDP2	Homo sapiens Jun dimerization protein 2 (JDP2), transcript variant 1, mRNA [NM_130469]	chr14	2.161	2.161	1.305e-05
NM_152259	C15orf42	Homo sapiens chromosome 15 open reading frame 42 (C15orf42), mRNA [NM_152259]	chr15	0.484	-2.067	1.405e-05
NM_024579	C1orf54	Homo sapiens chromosome 1 open reading frame 54 (C1orf54), mRNA [NM_024579]	chr1	2.305	2.305	1.422e-05
NM_033520	C19orf33	Homo sapiens chromosome 19 open reading frame 33 (C19orf33), mRNA [NM_033520]	chr19	2.145	2.145	1.437e-05
NM_021101	CLDN1	Homo sapiens claudin 1 (CLDN1), mRNA [NM_021101]	chr3	2.354	2.354	1.479e-05
NM_001909	CTSD	Homo sapiens cathepsin D (CTSD), mRNA [NM_001909]	chr11	2.433	2.433	1.495e-05
NM_001042465	PSAP	Homo sapiens prosaposin (PSAP), transcript variant 2, mRNA [NM_001042465]	chr10	2.078	2.078	1.496e-05
NM_000201	ICAM1	Homo sapiens intercellular adhesion molecule 1 (ICAM1), mRNA [NM_000201]	chr19	2.108	2.108	1.545e-05
NM_000331	SAA1	Homo sapiens serum amyloid A1 (SAA1), transcript variant 1, mRNA [NM_000331]	chr11	2.266	2.266	1.562e-05
NM_002091	GRP	Homo sapiens gastrin-releasing peptide (GRP), transcript variant 1, mRNA [NM_002091]	chr18	0.268	-3.726	1.568e-05
NM_001172501	SLC6A2	Homo sapiens solute carrier family 6 (neurotransmitter transporter, noradrenalin), member 2 (SLC6A2), transcript variant 2, mRNA [NM_001172501]	chr16	2.371	2.371	1.693e-05
NM_018593	SLC16A10	Homo sapiens solute carrier family 16, member 10 (aromatic amino acid transporter) (SLC16A10), mRNA [NM_018593]	chr6	0.486	-2.058	1.694e-05
NM_022157	RRAGC	Homo sapiens Ras-related GTP binding C (RRAGC), mRNA [NM_022157]	chr1	2.22	2.22	1.734e-05
NR_033309	SNORA70F	Homo sapiens small nucleolar RNA, H/ACA box 70F (retrotransposed) (SNORA70F), small nucleolar RNA [NR_033309]	chr2	0.396	-2.525	1.798e-05
NM_014736	KIAA0101	Homo sapiens KIAA0101 (KIAA0101), transcript variant 1, mRNA [NM_014736]	chr15	0.433	-2.308	1.798e-05
NM_018176	LGI2	Homo sapiens leucine-rich repeat LGI family, member 2 (LGI2), mRNA [NM_018176]	chr4	0.474	-2.108	1.828e-05
NM_012168	FBXO2	Homo sapiens F-box protein 2 (FBXO2), mRNA [NM_012168]	chr1	2.266	2.266	1.828e-05
NM_006454	MXD4	Homo sapiens MAX dimerization protein 4 (MXD4), mRNA [NM_006454]	chr4	2.214	2.214	1.828e-05
NM_080596	HIST1H2AH	Homo sapiens histone cluster 1, H2ah (HIST1H2AH), mRNA [NM_080596]	chr6	0.452	-2.213	1.917e-05
ENST00000314088	HIST1H2AC	histone cluster 1, H2ac [Source:HGNC Symbol;Acc:4733] [ENST00000314088]	chr6	2.157	2.157	2.002e-05
NM_144580	C1orf85	Homo sapiens chromosome 1 open reading frame 85 (C1orf85), mRNA [NM_144580]	chr1	2.071	2.071	2.032e-05
NM_032450	HEATR7A	Homo sapiens HEAT repeat containing 7A (HEATR7A), transcript variant 1, mRNA [NM_032450]	chr8	2.413	2.413	2.039e-05
NM_003536	HIST1H3H	Homo sapiens histone cluster 1, H3h (HIST1H3H), mRNA [NM_003536]	chr6	0.495	-2.018	2.063e-05
NM_007224	NXPH4	Homo sapiens neurexophilin 4 (NXPH4), mRNA [NM_007224]	chr12	2.12	2.12	2.148e-05
NM_001242313	TMEM191B	Homo sapiens transmembrane protein 191B (TMEM191B), mRNA [NM_001242313]	chr22	2.049	2.049	2.278e-05
NM_001161404	LIMS2	Homo sapiens LIM and senescent cell antigen-like domains 2 (LIMS2), transcript variant 5, mRNA [NM_001161404]	chr2	2.241	2.241	2.294e-05
NM_033452	TRIM47	Homo sapiens tripartite motif containing 47 (TRIM47), mRNA [NM_033452]	chr17	2.089	2.089	2.339e-05
NR_002739	SNORD56	Homo sapiens small nucleolar RNA, C/D box 56 (SNORD56), small nuclear RNA [NR_002739]	chr20	0.476	-2.1	2.339e-05
NR_003007	SCARNA23	Homo sapiens small Cajal body-specific RNA 23 (SCARNA23), guide RNA [NR_003007]	chrX	0.385	-2.597	2.365e-05
NM_003542	HIST1H4C	Homo sapiens histone cluster 1, H4c (HIST1H4C), mRNA [NM_003542]	chr6	0.473	-2.115	2.374e-05
NM_006398	UBD	Homo sapiens ubiquitin D (UBD), mRNA [NM_006398]	chr6	2.142	2.142	2.436e-05
NM_001080539	CCDC150	Homo sapiens coiled-coil domain containing 150 (CCDC150), mRNA [NM_001080539]	chr2	0.426	-2.345	2.524e-05
NM_019851	FGF20	Homo sapiens fibroblast growth factor 20 (FGF20), mRNA [NM_019851]	chr8	0.403	-2.48	2.614e-05
NM_178858	SFXN2	Homo sapiens sideroflexin 2 (SFXN2), mRNA [NM_178858]	chr10	0.488	-2.048	2.614e-05
NM_003256	TIMP4	Homo sapiens TIMP metallopeptidase inhibitor 4 (TIMP4), mRNA [NM_003256]	chr3	2.166	2.166	2.696e-05
NR_002559	SNORD29	Homo sapiens small nucleolar RNA, C/D box 29 (SNORD29), small nucleolar RNA [NR_002559]	chr11	0.456	-2.193	2.707e-05
NM_018296	LRRC36	Homo sapiens leucine rich repeat containing 36 (LRRC36), transcript variant 1, mRNA [NM_018296]	chr16	2.045	2.045	2.783e-05
AK123495	LOC389831	Q86U02_HUMAN (Q86U02) Full-length cDNA clone CS0DI010YI19 of Placenta of Homo sapiens (human), partial (26%) [THC2501093]	chr7_gl000195_random	0.46	-2.174	2.783e-05
NM_001078166	SRSF1	Homo sapiens serine/arginine-rich splicing factor 1 (SRSF1), transcript variant 2, mRNA [NM_001078166]	chr17	0.471	-2.125	3.029e-05
NM_001085480	FAM162B	Homo sapiens family with sequence similarity 162, member B (FAM162B), mRNA [NM_001085480]	chr6	0.47	-2.129	3.150e-05
NR_034154	C11orf92	Homo sapiens chromosome 11 open reading frame 92 (C11orf92), non-coding RNA [NR_034154]	chr11	0.492	-2.032	3.219e-05
NM_021067	GINS1	Homo sapiens GINS complex subunit 1 (Psf1 homolog) (GINS1), mRNA [NM_021067]	chr20	0.497	-2.012	3.313e-05
NM_005896	IDH1	Homo sapiens isocitrate dehydrogenase 1 (NADP+), soluble (IDH1), mRNA [NM_005896]	chr2	2.066	2.066	3.472e-05
NM_023004	RTN4R	Homo sapiens reticulon 4 receptor (RTN4R), mRNA [NM_023004]	chr22	2.098	2.098	3.561e-05
NM_058229	FBXO32	Homo sapiens F-box protein 32 (FBXO32), transcript variant 1, mRNA [NM_058229]	chr8	2.27	2.27	3.561e-05
NM_031229	RBCK1	Homo sapiens RanBP-type and C3HC4-type zinc finger containing 1 (RBCK1), transcript variant 2, mRNA [NM_031229]	chr20	2.29	2.29	3.601e-05
NM_020740	ANKFY1	Homo sapiens ankyrin repeat and FYVE domain containing 1 (ANKFY1), transcript variant 2, mRNA [NM_020740]	chr17	0.489	-2.045	3.669e-05
NM_004751	GCNT3	Homo sapiens glucosaminyl (N-acetyl) transferase 3, mucin type (GCNT3), mRNA [NM_004751]	chr15	2.33	2.33	3.894e-05
NM_000238	KCNH2	Homo sapiens potassium voltage-gated channel, subfamily H (eag-related), member 2 (KCNH2), transcript variant 1, mRNA [NM_000238]	chr7	2.344	2.344	3.933e-05
BX106402	BX106402	BX106402 Soares_NFL_T_GBC_S1 Homo sapiens cDNA clone IMAGp998J223812, mRNA sequence [BX106402]	chr8	0.437	-2.287	3.933e-05
NM_001012631	IL32	Homo sapiens interleukin 32 (IL32), transcript variant 1, mRNA [NM_001012631]	chr16	2.243	2.243	4.097e-05
NM_173833	SCARA5	Homo sapiens scavenger receptor class A, member 5 (putative) (SCARA5), mRNA [NM_173833]	chr8	2.003	2.003	4.243e-05
NM_012268	PLD3	Homo sapiens phospholipase D family, member 3 (PLD3), transcript variant 2, mRNA [NM_012268]	chr19	2.087	2.087	4.303e-05
NM_212559	XKRX	Homo sapiens XK, Kell blood group complex subunit-related, X-linked (XKRX), mRNA [NM_212559]	chrX	0.49	-2.043	4.586e-05
NM_001242369	C9orf7	Homo sapiens chromosome 9 open reading frame 7 (C9orf7), transcript variant 3, mRNA [NM_001242369]	chr9	2.338	2.338	4.699e-05
NM_003054	SLC18A2	Homo sapiens solute carrier family 18 (vesicular monoamine), member 2 (SLC18A2), mRNA [NM_003054]	chr10	0.456	-2.192	4.703e-05
NM_022460	HS1BP3	Homo sapiens HCLS1 binding protein 3 (HS1BP3), mRNA [NM_022460]	chr2	2.033	2.033	4.703e-05
NM_024046	CAMKV	Homo sapiens CaM kinase-like vesicle-associated (CAMKV), mRNA [NM_024046]	chr3	0.471	-2.122	4.703e-05
NM_207627	ABCG1	Homo sapiens ATP-binding cassette, sub-family G (WHITE), member 1 (ABCG1), transcript variant 5, mRNA [NM_207627]	chr21	2.12	2.12	4.707e-05
NM_000864	HTR1D	Homo sapiens 5-hydroxytryptamine (serotonin) receptor 1D (HTR1D), mRNA [NM_000864]	chr1	2.078	2.078	4.725e-05
NM_002087	GRN	Homo sapiens granulin (GRN), mRNA [NM_002087]	chr17	2.054	2.054	4.789e-05
NM_153608	ZNF114	Homo sapiens zinc finger protein 114 (ZNF114), mRNA [NM_153608]	chr19	2.324	2.324	4.801e-05
NM_032117	MND1	Homo sapiens meiotic nuclear divisions 1 homolog (S. cerevisiae) (MND1), mRNA [NM_032117]	chr4	0.428	-2.337	4.864e-05
NM_006290	TNFAIP3	Homo sapiens tumor necrosis factor, alpha-induced protein 3 (TNFAIP3), mRNA [NM_006290]	chr6	2.112	2.112	4.963e-05
NM_002527	NTF3	Homo sapiens neurotrophin 3 (NTF3), transcript variant 2, mRNA [NM_002527]	chr12	0.467	-2.142	5.077e-05
NM_001244710	GFPT1	Homo sapiens glutamine--fructose-6-phosphate transaminase 1 (GFPT1), transcript variant 1, mRNA [NM_001244710]	chr2	2.192	2.192	5.186e-05
NM_020524	PBXIP1	Homo sapiens pre-B-cell leukemia homeobox interacting protein 1 (PBXIP1), mRNA [NM_020524]	chr1	2.037	2.037	5.333e-05
NM_014330	PPP1R15A	Homo sapiens protein phosphatase 1, regulatory subunit 15A (PPP1R15A), mRNA [NM_014330]	chr19	2.302	2.302	5.674e-05
NM_006438	COLEC10	Homo sapiens collectin sub-family member 10 (C-type lectin) (COLEC10), mRNA [NM_006438]	chr8	0.482	-2.077	5.842e-05
ENST00000445310	ENST00000445310	KCNQ5 intronic transcript 1 (non-protein coding) [Source:HGNC Symbol;Acc:41354] [ENST00000445310]	chr6	0.372	-2.685	6.276e-05
NM_013377	PDZRN4	Homo sapiens PDZ domain containing ring finger 4 (PDZRN4), transcript variant 2, mRNA [NM_013377]	chr12	0.437	-2.287	6.401e-05
XR_109343	LOC100506251	PREDICTED: Homo sapiens hypothetical LOC100506251 (LOC100506251), miscRNA [XR_109343]	chr16	0.422	-2.368	6.602e-05
NM_002514	NOV	Homo sapiens nephroblastoma overexpressed gene (NOV), mRNA [NM_002514]	chr8	2.123	2.123	6.602e-05
NM_003543	HIST1H4H	Homo sapiens histone cluster 1, H4h (HIST1H4H), mRNA [NM_003543]	chr6	0.496	-2.018	6.770e-05
NR_024356	FBLL1	Homo sapiens fibrillarin-like 1 (FBLL1), non-coding RNA [NR_024356]	chr5	2.443	2.443	6.827e-05
NM_024943	TMEM156	Homo sapiens transmembrane protein 156 (TMEM156), mRNA [NM_024943]	chr4	2.107	2.107	6.973e-05
NM_182802	MCM8	Homo sapiens minichromosome maintenance complex component 8 (MCM8), transcript variant 2, mRNA [NM_182802]	chr20	0.437	-2.29	7.316e-05
NM_003874	CD84	Homo sapiens CD84 molecule (CD84), transcript variant 2, mRNA [NM_003874]	chr1	0.417	-2.4	7.486e-05
NM_014685	HERPUD1	Homo sapiens homocysteine-inducible, endoplasmic reticulum stress-inducible, ubiquitin-like domain member 1 (HERPUD1), transcript variant 1, mRNA [NM_014685]	chr16	2.202	2.202	7.745e-05
NM_004669	CLIC3	Homo sapiens chloride intracellular channel 3 (CLIC3), mRNA [NM_004669]	chr9	2.011	2.011	7.745e-05
NM_000280	PAX6	Homo sapiens paired box 6 (PAX6), transcript variant 1, mRNA [NM_000280]	chr11	2.1	2.1	7.866e-05
NR_038253	LOC100288637	Homo sapiens OTU domain containing 7A pseudogene (LOC100288637), transcript variant 1, non-coding RNA [NR_038253]	chr15	0.464	-2.154	8.079e-05
NM_001375	DNASE2	Homo sapiens deoxyribonuclease II, lysosomal (DNASE2), mRNA [NM_001375]	chr19	2.053	2.053	8.463e-05
NM_005165	ALDOC	Homo sapiens aldolase C, fructose-bisphosphate (ALDOC), mRNA [NM_005165]	chr17	2.027	2.027	8.463e-05
A_33_P3378697	A_33_P3378697	Unknown	chr7_gl000195_random	0.444	-2.253	8.633e-05
NM_001018073	PCK2	Homo sapiens phosphoenolpyruvate carboxykinase 2 (mitochondrial) (PCK2), nuclear gene encoding mitochondrial protein, transcript variant 2, mRNA [NM_001018073]	chr14	2.038	2.038	9.529e-05
NR_003021	SNORA79	Homo sapiens small nucleolar RNA, H/ACA box 79 (SNORA79), small nucleolar RNA [NR_003021]	chr14	0.326	-3.069	9.573e-05
AK127393	FLJ45482	Homo sapiens cDNA FLJ45482 fis, clone BRTHA2001953. [AK127393]	chr7_gl000195_random	0.37	-2.706	1.004e-04
NM_003522	HIST1H2BF	Homo sapiens histone cluster 1, H2bf (HIST1H2BF), mRNA [NM_003522]	chr6	0.467	-2.14	1.015e-04
THC2511093	THC2511093	COEA1_HUMAN (Q05707) Collagen alpha-1(XIV) chain precursor (Undulin), partial (27%) [THC2511093]	chr7	0.451	-2.216	1.025e-04
NR_038384	LOC728012	Homo sapiens uncharacterized LOC728012 (LOC728012), non-coding RNA [NR_038384]	chr6	0.465	-2.149	1.083e-04
NM_024629	MLF1IP	Homo sapiens MLF1 interacting protein (MLF1IP), mRNA [NM_024629]	chr4	0.461	-2.17	1.193e-04
NM_022909	CENPH	Homo sapiens centromere protein H (CENPH), mRNA [NM_022909]	chr5	0.488	-2.047	1.263e-04
NM_032496	ARHGAP9	Homo sapiens Rho GTPase activating protein 9 (ARHGAP9), transcript variant 1, mRNA [NM_032496]	chr12	3.494	3.494	1.266e-04
NR_004396	SNORD1B	Homo sapiens small nucleolar RNA, C/D box 1B (SNORD1B), small nucleolar RNA [NR_004396]	chr17	0.419	-2.387	1.311e-04
BC017979	XLOC_014513	ALU6_HUMAN (P39193) Alu subfamily SP sequence contamination warning entry, partial (9%) [THC2502608]	chr7_gl000195_random	0.46	-2.173	1.384e-04
NM_001142777	HSD3B7	Homo sapiens hydroxy-delta-5-steroid dehydrogenase, 3 beta- and steroid delta-isomerase 7 (HSD3B7), transcript variant 2, mRNA [NM_001142777]	chr16	2.063	2.063	1.454e-04
TCONS_00025888	XLOC_012162	BROAD Institute lincRNA (XLOC_012162), lincRNA [TCONS_00025888]	chr17	0.421	-2.376	1.508e-04
AL049987	XLOC_l2_012083	Homo sapiens mRNA; cDNA DKFZp564F112 (from clone DKFZp564F112) [AL049987]	chr5	0.465	-2.15	1.625e-04
A_24_P221485	A_24_P221485	Unknown	chr1	2.166	2.166	1.640e-04
NM_016564	CEND1	Homo sapiens cell cycle exit and neuronal differentiation 1 (CEND1), mRNA [NM_016564]	chr11	2.064	2.064	1.706e-04
NM_015038	KIAA0754	Homo sapiens KIAA0754 (KIAA0754), mRNA [NM_015038]	chr1	0.437	-2.287	1.725e-04
NM_003540	HIST1H4F	Homo sapiens histone cluster 1, H4f (HIST1H4F), mRNA [NM_003540]	chr6	0.438	-2.281	1.772e-04
BC015320	PRO0628	Homo sapiens, clone IMAGE:4399587, mRNA. [BC015320]	chr20	0.479	-2.089	1.785e-04
NM_001142522	FBXO5	Homo sapiens F-box protein 5 (FBXO5), transcript variant 2, mRNA [NM_001142522]	chr6	0.468	-2.136	1.860e-04
NR_003706	SNORA38B	Homo sapiens small nucleolar RNA, H/ACA box 38B (retrotransposed) (SNORA38B), small nucleolar RNA [NR_003706]	chr17	0.478	-2.091	2.052e-04
XR_113288	LOC100507312	PREDICTED: Homo sapiens hypothetical LOC100507312, transcript variant 1 (LOC100507312), miscRNA [XR_113288]	chr17_gl000205_random	0.468	-2.139	2.076e-04
NM_203394	E2F7	Homo sapiens E2F transcription factor 7 (E2F7), mRNA [NM_203394]	chr12	0.472	-2.119	2.094e-04
NM_020394	ZNF695	Homo sapiens zinc finger protein 695 (ZNF695), transcript variant 1, mRNA [NM_020394]	chr1	0.457	-2.186	2.185e-04
A_33_P3279526	A_33_P3279526	Unknown	chr7	2.359	2.359	2.325e-04
NM_002133	HMOX1	Homo sapiens heme oxygenase (decycling) 1 (HMOX1), mRNA [NM_002133]	chr22	2.354	2.354	2.382e-04
NM_001032998	KYNU	Homo sapiens kynureninase (KYNU), transcript variant 2, mRNA [NM_001032998]	chr2	2.085	2.085	2.386e-04
NR_002771	DLEU2L	Homo sapiens deleted in lymphocytic leukemia 2-like (DLEU2L), non-coding RNA [NR_002771]	chr1	0.446	-2.242	2.416e-04
NM_004165	RRAD	Homo sapiens Ras-related associated with diabetes (RRAD), transcript variant 2, mRNA [NM_004165]	chr16	2.071	2.071	2.449e-04
TCONS_00024405	XLOC_011722	BROAD Institute lincRNA (XLOC_011722), lincRNA [TCONS_00024405]	chr16	2.361	2.361	2.479e-04
NM_001168214	C3orf80	Homo sapiens chromosome 3 open reading frame 80 (C3orf80), mRNA [NM_001168214]	chr3	2.214	2.214	2.479e-04
NM_003541	HIST1H4K	Homo sapiens histone cluster 1, H4k (HIST1H4K), mRNA [NM_003541]	chr6	0.464	-2.155	2.504e-04
AK125767	LOC729968	Homo sapiens cDNA FLJ43779 fis, clone TESTI2051488. [AK125767]	chr2	0.437	-2.288	2.529e-04
AK021772	FLJ11710	Homo sapiens cDNA FLJ11710 fis, clone HEMBA1005149. [AK021772]	chr17	0.42	-2.384	2.551e-04
NM_014420	DKK4	Homo sapiens dickkopf homolog 4 (Xenopus laevis) (DKK4), mRNA [NM_014420]	chr8	0.428	-2.335	2.690e-04
NM_002282	KRT83	Homo sapiens keratin 83 (KRT83), mRNA [NM_002282]	chr12	2.147	2.147	2.706e-04
NM_000729	CCK	Homo sapiens cholecystokinin (CCK), transcript variant 1, mRNA [NM_000729]	chr3	2.026	2.026	2.732e-04
NM_138995	MYO3B	Homo sapiens myosin IIIB (MYO3B), transcript variant 2, mRNA [NM_138995]	chr2	0.5	-2.001	2.795e-04
NM_145664	SPANXB2	Homo sapiens SPANX family, member B2 (SPANXB2), mRNA [NM_145664]	chrX	2.009	2.009	2.966e-04
NM_198582	KLHL30	Homo sapiens kelch-like 30 (Drosophila) (KLHL30), mRNA [NM_198582]	chr2	2.196	2.196	2.988e-04
XM_001716361	LOC388210	PREDICTED: Homo sapiens apolipophorins-like (LOC388210), mRNA [XM_001716361]	chr16	5.743	5.743	3.034e-04
NM_022350	ERAP2	Homo sapiens endoplasmic reticulum aminopeptidase 2 (ERAP2), transcript variant 1, mRNA [NM_022350]	chr5	2.289	2.289	3.121e-04
ENST00000469216	XLOC_l2_009899	PREDICTED: Homo sapiens hypothetical LOC100507274 (LOC100507274), miscRNA [XR_108494]	chr3	0.43	-2.327	3.174e-04
A_33_P3315899	A_33_P3315899	Unknown	chr20	5.381	5.381	3.198e-04
NM_007286	SYNPO	Homo sapiens synaptopodin (SYNPO), transcript variant 1, mRNA [NM_007286]	chr5	2.09	2.09	3.342e-04
NM_152513	MEI1	Homo sapiens meiosis inhibitor 1 (MEI1), mRNA [NM_152513]	chr22	2.012	2.012	3.504e-04
ENST00000432984	XLOC_001645	BROAD Institute lincRNA (XLOC_001645), lincRNA [TCONS_00002991]	chr2	2.503	2.503	3.531e-04
NM_144967	ARHGAP36	Homo sapiens Rho GTPase activating protein 36 (ARHGAP36), mRNA [NM_144967]	chrX	2.193	2.193	3.550e-04
NM_000717	CA4	Homo sapiens carbonic anhydrase IV (CA4), mRNA [NM_000717]	chr17	0.495	-2.022	3.633e-04
TCONS_00012778	XLOC_005815	BROAD Institute lincRNA (XLOC_005815), lincRNA [TCONS_00012778]	chr6	0.391	-2.559	3.673e-04
NM_003064	SLPI	Homo sapiens secretory leukocyte peptidase inhibitor (SLPI), mRNA [NM_003064]	chr20	2.034	2.034	3.817e-04
NM_001141	ALOX15B	Homo sapiens arachidonate 15-lipoxygenase, type B (ALOX15B), transcript variant d, mRNA [NM_001141]	chr17	2.147	2.147	4.107e-04
NM_005431	XRCC2	Homo sapiens X-ray repair complementing defective repair in Chinese hamster cells 2 (XRCC2), mRNA [NM_005431]	chr7	0.403	-2.478	4.319e-04
NM_017644	KLHL24	Homo sapiens kelch-like 24 (Drosophila) (KLHL24), mRNA [NM_017644]	chr3	2.354	2.354	4.553e-04
NM_016246	HSD17B14	Homo sapiens hydroxysteroid (17-beta) dehydrogenase 14 (HSD17B14), mRNA [NM_016246]	chr19	2.229	2.229	4.584e-04
NR_003026	SNORA1	Homo sapiens small nucleolar RNA, H/ACA box 1 (SNORA1), small nucleolar RNA [NR_003026]	chr11	0.493	-2.028	4.924e-04
NR_002962	SNORA23	Homo sapiens small nucleolar RNA, H/ACA box 23 (SNORA23), small nucleolar RNA [NR_002962]	chr11	0.486	-2.058	5.006e-04
AK127400	LOC100130256	Homo sapiens cDNA FLJ45491 fis, clone BRTHA2006720. [AK127400]	chr2	0.389	-2.573	5.210e-04
NM_018129	PNPO	Homo sapiens pyridoxamine 5'-phosphate oxidase (PNPO), mRNA [NM_018129]	chr17	9.391	9.391	5.235e-04
NM_203403	C9orf150	Homo sapiens chromosome 9 open reading frame 150 (C9orf150), mRNA [NM_203403]	chr9	2.209	2.209	5.314e-04
NM_001130518	CSGALNACT1	Homo sapiens chondroitin sulfate N-acetylgalactosaminyltransferase 1 (CSGALNACT1), transcript variant 1, mRNA [NM_001130518]	chr8	2.098	2.098	5.672e-04
NM_178495	ITPRIPL1	Homo sapiens inositol 1,4,5-trisphosphate receptor interacting protein-like 1 (ITPRIPL1), transcript variant 1, mRNA [NM_178495]	chr2	0.482	-2.075	5.810e-04
NM_013453	SPANXA1	Homo sapiens sperm protein associated with the nucleus, X-linked, family member A1 (SPANXA1), mRNA [NM_013453]	chrX	2.007	2.007	5.940e-04
A_33_P3352837	A_33_P3352837	Unknown	chr2	0.422	-2.367	5.944e-04
NM_021968	HIST1H4J	Homo sapiens histone cluster 1, H4j (HIST1H4J), mRNA [NM_021968]	chr6	0.485	-2.061	6.217e-04
NM_001034	RRM2	Homo sapiens ribonucleotide reductase M2 (RRM2), transcript variant 2, mRNA [NM_001034]	chr2	0.484	-2.064	6.300e-04
ENST00000435624	ENST00000435624	Unknown	chr14	0.462	-2.165	6.435e-04
NM_001172173	CSRNP3	Homo sapiens cysteine-serine-rich nuclear protein 3 (CSRNP3), transcript variant 1, mRNA [NM_001172173]	chr2	0.384	-2.601	6.621e-04
NM_032524	KRTAP4-4	Homo sapiens keratin associated protein 4-4 (KRTAP4-4), mRNA [NM_032524]	chr17	2.107	2.107	6.683e-04
NM_000584	IL8	Homo sapiens interleukin 8 (IL8), mRNA [NM_000584]	chr4	3.406	3.406	6.804e-04
NM_001201	BMP3	Homo sapiens bone morphogenetic protein 3 (BMP3), mRNA [NM_001201]	chr4	2.072	2.072	7.322e-04
NR_003139	SCARNA18	Homo sapiens small Cajal body-specific RNA 18 (SCARNA18), guide RNA [NR_003139]	chr5	0.487	-2.053	7.334e-04
NM_005914	MCM4	Homo sapiens minichromosome maintenance complex component 4 (MCM4), transcript variant 1, mRNA [NM_005914]	chr8	0.413	-2.421	7.402e-04
XR_110372	LOC100129940	PREDICTED: Homo sapiens hypothetical LOC100129940 (LOC100129940), miscRNA [XR_110372]	chr12	0.385	-2.599	7.772e-04
ENST00000454651	ENST00000454651	DB229023 TRACH3 Homo sapiens cDNA clone TRACH3022015 5', mRNA sequence [DB229023]	chr1	6.604	6.604	8.046e-04
THC2540172	THC2540172	Q9WVL8_MOUSE (Q9WVL8) Zinc finger type transcription factor MZF-3, partial (25%) [THC2540172]	chr7	0.456	-2.192	8.656e-04
NM_000507	FBP1	Homo sapiens fructose-1,6-bisphosphatase 1 (FBP1), transcript variant 1, mRNA [NM_000507]	chr9	2.158	2.158	8.702e-04
NM_031894	FTHL17	Homo sapiens ferritin, heavy polypeptide-like 17 (FTHL17), mRNA [NM_031894]	chrX	2.07	2.07	8.984e-04
NM_020242	KIF15	Homo sapiens kinesin family member 15 (KIF15), mRNA [NM_020242]	chr3	0.495	-2.021	8.988e-04
NM_153461	IL17RC	Homo sapiens interleukin 17 receptor C (IL17RC), transcript variant 2, mRNA [NM_153461]	chr3	3.184	3.184	9.215e-04
NM_014996	PLCH1	Homo sapiens phospholipase C, eta 1 (PLCH1), transcript variant 2, mRNA [NM_014996]	chr3	0.452	-2.21	9.848e-04
NM_014900	COBLL1	Homo sapiens COBL-like 1 (COBLL1), mRNA [NM_014900]	chr2	0.438	-2.281	9.855e-04
AL050097	DKFZP586B0319	Homo sapiens mRNA; cDNA DKFZp586B0319 (from clone DKFZp586B0319) [AL050097]	chr3	0.375	-2.668	1.089e-03
NM_001080458	EVX2	Homo sapiens even-skipped homeobox 2 (EVX2), mRNA [NM_001080458]	chr2	2.264	2.264	1.091e-03
NM_022834	VWA1	Homo sapiens von Willebrand factor A domain containing 1 (VWA1), transcript variant 1, mRNA [NM_022834]	chr1	3.689	3.689	1.093e-03
XR_108868	LOC100506538	PREDICTED: Homo sapiens hypothetical LOC100506538 (LOC100506538), miscRNA [XR_108868]	chr8	0.419	-2.389	1.094e-03
NR_003009	SCARNA8	Homo sapiens small Cajal body-specific RNA 8 (SCARNA8), guide RNA [NR_003009]	chr9	0.47	-2.128	1.094e-03
TCONS_00024502	XLOC_011821	BROAD Institute lincRNA (XLOC_011821), lincRNA [TCONS_00024502]	chr16	2.516	2.516	1.122e-03
NR_024456	LOC100190986	Homo sapiens uncharacterized LOC100190986 (LOC100190986), non-coding RNA [NR_024456]	chr16	0.441	-2.266	1.163e-03
NM_006033	LIPG	Homo sapiens lipase, endothelial (LIPG), mRNA [NM_006033]	chr18	2.062	2.062	1.222e-03
TCONS_00023086	XLOC_010979	BROAD Institute lincRNA (XLOC_010979), lincRNA [TCONS_00023086]	chr14	3.217	3.217	1.268e-03
NR_004388	SCARNA14	Homo sapiens small Cajal body-specific RNA 14 (SCARNA14), guide RNA [NR_004388]	chr15	0.486	-2.057	1.289e-03
NM_020116	FSTL5	Homo sapiens follistatin-like 5 (FSTL5), transcript variant 1, mRNA [NM_020116]	chr4	0.387	-2.586	1.302e-03
NM_199420	POLQ	Homo sapiens polymerase (DNA directed), theta (POLQ), mRNA [NM_199420]	chr3	0.476	-2.099	1.352e-03
NR_002981	SNORA51	Homo sapiens small nucleolar RNA, H/ACA box 51 (SNORA51), small nucleolar RNA [NR_002981]	chr20	0.478	-2.091	1.389e-03
NM_001013838	RLTPR	Homo sapiens RGD motif, leucine rich repeats, tropomodulin domain and proline-rich containing (RLTPR), mRNA [NM_001013838]	chr16	2.776	2.776	1.514e-03
BC014063	BC014063	Homo sapiens hypothetical protein LOC151878, mRNA (cDNA clone IMAGE:3844647), partial cds. [BC014063]	chr3	0.402	-2.488	1.669e-03
ENST00000495748	PTPRK	protein tyrosine phosphatase, receptor type, K [Source:HGNC Symbol;Acc:9674] [ENST00000495748]	chr6	0.354	-2.823	1.742e-03
ENST00000483169	XLOC_010390	Unknown	chr13	0.393	-2.548	1.766e-03
NR_037178	LOC100294145	Homo sapiens uncharacterized LOC100294145 (LOC100294145), transcript variant 2, non-coding RNA [NR_037178]	chr6	9.146	9.146	1.767e-03
NM_080660	ZC3HAV1L	Homo sapiens zinc finger CCCH-type, antiviral 1-like (ZC3HAV1L), mRNA [NM_080660]	chr7	2.774	2.774	1.777e-03
NM_001145161	UBE2QL1	Homo sapiens ubiquitin-conjugating enzyme E2Q family-like 1 (UBE2QL1), mRNA [NM_001145161]	chr5	2.038	2.038	1.789e-03
NM_001164554	DISC1	Homo sapiens disrupted in schizophrenia 1 (DISC1), transcript variant q, mRNA [NM_001164554]	chr1	0.444	-2.251	1.858e-03
NR_038945	LOC100128264	Homo sapiens uncharacterized LOC100128264 (LOC100128264), non-coding RNA [NR_038945]	chr7	2.642	2.642	1.953e-03
NR_036536	SNHG4	Homo sapiens small nucleolar RNA host gene 4 (non-protein coding) (SNHG4), transcript variant 2, non-coding RNA [NR_036536]	chr5	0.459	-2.18	1.966e-03
NM_182965	SPHK1	Homo sapiens sphingosine kinase 1 (SPHK1), transcript variant 2, mRNA [NM_182965]	chr17	4.497	4.497	2.001e-03
THC2548681	XLOC_010998	BROAD Institute lincRNA (XLOC_010998), lincRNA [TCONS_00022712]	chr14	0.496	-2.016	2.020e-03
ENST00000367690	ENST00000367690	RAB GTPase activating protein 1-like [Source:HGNC Symbol;Acc:24663] [ENST00000367690]	chr1	0.467	-2.139	2.183e-03
NM_004591	CCL20	Homo sapiens chemokine (C-C motif) ligand 20 (CCL20), transcript variant 1, mRNA [NM_004591]	chr2	2.057	2.057	2.273e-03
TCONS_00021991	XLOC_010591	BROAD Institute lincRNA (XLOC_010591), lincRNA [TCONS_00021991]	chr13	0.381	-2.625	2.318e-03
ENST00000505319	SPRY1	sprouty homolog 1, antagonist of FGF signaling (Drosophila) [Source:HGNC Symbol;Acc:11269] [ENST00000505319]	chr4	5.105	5.105	2.368e-03
NM_003811	TNFSF9	Homo sapiens tumor necrosis factor (ligand) superfamily, member 9 (TNFSF9), mRNA [NM_003811]	chr19	2.003	2.003	2.385e-03
NM_133334	WHSC1	Homo sapiens Wolf-Hirschhorn syndrome candidate 1 (WHSC1), transcript variant 7, mRNA [NM_133334]	chr4	0.473	-2.112	2.630e-03
ENST00000498714	FOXP1-IT1	PREDICTED: Homo sapiens FOXP1 intronic transcript 1 (non-protein coding) (FOXP1-IT1), miscRNA [XR_112508]	chr3	0.45	-2.221	2.658e-03
NM_004347	CASP5	Homo sapiens caspase 5, apoptosis-related cysteine peptidase (CASP5), transcript variant a, mRNA [NM_004347]	chr11	2.012	2.012	2.658e-03
BI224516	BI224516	602939790F1 NIH_MGC_12 Homo sapiens cDNA clone IMAGE:5102926 5', mRNA sequence [BI224516]	unmapped	5.618	5.618	2.722e-03
A_33_P3399181	A_33_P3399181	Unknown	chr17	5.782	5.782	3.144e-03
BC008131	LOC142937	Homo sapiens cDNA clone IMAGE:3454038. [BC008131]	chr10	0.469	-2.134	3.146e-03
NM_021911	GABRB2	Homo sapiens gamma-aminobutyric acid (GABA) A receptor, beta 2 (GABRB2), transcript variant 1, mRNA [NM_021911]	chr5	0.388	-2.575	3.426e-03
TCONS_l2_00018877	XLOC_l2_009899	BROAD Institute lincRNA (XLOC_l2_009899), lincRNA [TCONS_l2_00018877]	chr3	0.476	-2.1	3.434e-03
CV322587	SNORA2A	CM3-MT0388-260101-688-e11_1 MT0388 Homo sapiens cDNA, mRNA sequence [CV322587]	chr12	0.441	-2.27	3.438e-03
NM_054023	SCGB3A2	Homo sapiens secretoglobin, family 3A, member 2 (SCGB3A2), mRNA [NM_054023]	chr5	4.389	4.389	3.553e-03
NR_021485	EGFEM1P	Homo sapiens EGF-like and EMI domain containing 1, pseudogene (EGFEM1P), non-coding RNA [NR_021485]	chr3	0.468	-2.136	3.558e-03
NM_015527	TBC1D10B	Homo sapiens TBC1 domain family, member 10B (TBC1D10B), mRNA [NM_015527]	chr16	4.661	4.661	3.642e-03
AK125205	AK125205	Homo sapiens cDNA FLJ43215 fis, clone FEBRA2021908. [AK125205]	chr2	3.741	3.741	3.650e-03
NM_001083	PDE5A	Homo sapiens phosphodiesterase 5A, cGMP-specific (PDE5A), transcript variant 1, mRNA [NM_001083]	chr4	0.453	-2.205	3.839e-03
NM_001039841	ARHGAP11B	Homo sapiens Rho GTPase activating protein 11B (ARHGAP11B), mRNA [NM_001039841]	chr15	0.488	-2.051	3.908e-03
NM_001169107	FAM21C	Homo sapiens family with sequence similarity 21, member C (FAM21C), transcript variant 3, mRNA [NM_001169107]	chr10	5.088	5.088	4.009e-03
BX648603	BX648603	Homo sapiens mRNA; cDNA DKFZp686G10213 (from clone DKFZp686G10213). [BX648603]	chr18	3.218	3.218	4.030e-03
A_33_P3280502	A_33_P3280502	Unknown	chr16	0.492	-2.032	4.036e-03
NM_021641	ADAM12	Homo sapiens ADAM metallopeptidase domain 12 (ADAM12), transcript variant 2, mRNA [NM_021641]	chr10	2.155	2.155	4.107e-03
NM_006467	POLR3G	Homo sapiens polymerase (RNA) III (DNA directed) polypeptide G (32kD) (POLR3G), mRNA [NM_006467]	chr5	0.472	-2.118	4.142e-03
ENST00000340926	SUN1	Sad1 and UNC84 domain containing 1 [Source:HGNC Symbol;Acc:18587] [ENST00000340926]	chr7	0.476	-2.101	4.443e-03
NM_018182	C17orf63	Homo sapiens chromosome 17 open reading frame 63 (C17orf63), transcript variant 2, mRNA [NM_018182]	chr17	10.175	10.175	4.630e-03
NM_203434	IER5L	Homo sapiens immediate early response 5-like (IER5L), mRNA [NM_203434]	chr9	6.787	6.787	4.685e-03
NM_004420	DUSP8	Homo sapiens dual specificity phosphatase 8 (DUSP8), mRNA [NM_004420]	chr11	2.923	2.923	4.779e-03
NM_013301	CCDC106	Homo sapiens coiled-coil domain containing 106 (CCDC106), mRNA [NM_013301]	chr19	2.01	2.01	4.935e-03
NM_005577	LPA	Homo sapiens lipoprotein, Lp(a) (LPA), mRNA [NM_005577]	chr6	2.037	2.037	5.142e-03
NM_015162	ACSBG1	Homo sapiens acyl-CoA synthetase bubblegum family member 1 (ACSBG1), transcript variant 1, mRNA [NM_015162]	chr15	0.442	-2.263	5.142e-03
NM_001080495	TNRC18	Homo sapiens trinucleotide repeat containing 18 (TNRC18), mRNA [NM_001080495]	chr7	5.337	5.337	5.150e-03
XR_111563	LOC100507803	PREDICTED: Homo sapiens hypothetical LOC100507803 (LOC100507803), miscRNA [XR_111563]	chr16	0.491	-2.036	5.162e-03
NM_006339	HMG20B	Homo sapiens high mobility group 20B (HMG20B), mRNA [NM_006339]	chr19	8.479	8.479	5.341e-03
TCONS_l2_00010092	XLOC_l2_005438	BROAD Institute lincRNA (XLOC_l2_005438), lincRNA [TCONS_l2_00010092]	chr16	0.453	-2.209	5.443e-03
ENST00000374945	ENST00000374945	Uncharacterized proteincDNA FLJ46600 fis, clone THYMU3047144 [Source:UniProtKB/TrEMBL;Acc:Q6ZR66] [ENST00000374945]	chr17	7.539	7.539	5.600e-03
ENST00000423269	CLTC-IT1	PREDICTED: Homo sapiens CLTC intronic transcript 1 (non-protein coding) (CLTC-IT1), mRNA [XM_003118745]	chr17	0.476	-2.1	5.651e-03
ENST00000369123	ENST00000369123	chromosome 6 open reading frame 220 [Source:HGNC Symbol;Acc:21553] [ENST00000369123]	chr6	27.421	27.421	5.693e-03
DB297613	XLOC_012335	DB297613 BRACE2 Homo sapiens cDNA clone BRACE2023991 3', mRNA sequence [DB297613]	chr17	5.954	5.954	5.723e-03
NM_001135914	KCP	Homo sapiens kielin/chordin-like protein (KCP), transcript variant 1, mRNA [NM_001135914]	chr7	12.046	12.046	6.156e-03
NM_024857	ATAD5	Homo sapiens ATPase family, AAA domain containing 5 (ATAD5), mRNA [NM_024857]	chr17	0.444	-2.253	6.490e-03
XM_003403523	IGANRP	PREDICTED: Homo sapiens hypothetical protein LOC100652933 (LOC100652933), mRNA [XM_003403523]	chr12	0.453	-2.209	6.738e-03
ENST00000266182	ENST00000266182	tubulin tyrosine ligase-like family, member 8 [Source:HGNC Symbol;Acc:34000] [ENST00000266182]	chr22	10.793	10.793	6.797e-03
NM_005556	KRT7	Homo sapiens keratin 7 (KRT7), mRNA [NM_005556]	chr12	4.211	4.211	6.941e-03
NM_001137560	TMEM151B	Homo sapiens transmembrane protein 151B (TMEM151B), mRNA [NM_001137560]	chr6	13.326	13.326	7.385e-03
ENST00000335083	LOC100652762	Uncharacterized protein [Source:UniProtKB/TrEMBL;Acc:A6NF06] [ENST00000335083]	chr10	8.174	8.174	7.612e-03
A_33_P3353906	A_33_P3353906	Unknown	chr5	7.582	7.582	7.631e-03
ENST00000419650	XLOC_001620	DB077273 TESTI4 Homo sapiens cDNA clone TESTI4021828 5', mRNA sequence [DB077273]	chr2	22.718	22.718	7.631e-03
NM_021181	SLAMF7	Homo sapiens SLAM family member 7 (SLAMF7), mRNA [NM_021181]	chr1	3.884	3.884	7.792e-03
NM_139280	ORMDL3	Homo sapiens ORM1-like 3 (S. cerevisiae) (ORMDL3), mRNA [NM_139280]	chr17	2.295	2.295	7.978e-03
XR_132703	LOC100128563	PREDICTED: Homo sapiens hypothetical LOC100128563 (LOC100128563), miscRNA [XR_132703]	chr2	0.42	-2.381	8.133e-03
ENST00000343123	XLOC_002995	Unknown	chr5	24.769	24.769	8.175e-03
ENST00000422600	XLOC_002217	DB092709 TESTI4 Homo sapiens cDNA clone TESTI4042421 5', mRNA sequence [DB092709]	chr2	3.863	3.863	8.203e-03
NM_198681	PLEKHG5	Homo sapiens pleckstrin homology domain containing, family G (with RhoGef domain) member 5 (PLEKHG5), transcript variant 2, mRNA [NM_198681]	chr1	9.371	9.371	8.306e-03
NM_178549	ZNF678	Homo sapiens zinc finger protein 678 (ZNF678), transcript variant 1, mRNA [NM_178549]	chr1	0.499	-2.004	8.403e-03
NM_205860	NR5A2	Homo sapiens nuclear receptor subfamily 5, group A, member 2 (NR5A2), transcript variant 1, mRNA [NM_205860]	chr1	0.494	-2.025	8.436e-03
NM_198956	SP8	Homo sapiens Sp8 transcription factor (SP8), transcript variant 2, mRNA [NM_198956]	chr7	22.77	22.77	8.485e-03
NM_013325	ATG4B	Homo sapiens ATG4 autophagy related 4 homolog B (S. cerevisiae) (ATG4B), transcript variant 1, mRNA [NM_013325]	chr2	6.144	6.144	8.561e-03
THC2529542	XLOC_l2_011987	Q94XE9_ANOTI (Q94XE9) NADH dehydrogenase subunit II (Fragment), partial (5%) [THC2529542]	chr5	0.429	-2.329	8.689e-03
THC2660992	THC2660992	Unknown	chr2	3.064	3.064	8.797e-03
NM_001244767	MOB1B	Homo sapiens MOB kinase activator 1B (MOB1B), transcript variant 3, mRNA [NM_001244767]	chr4	11.822	11.822	8.975e-03
NM_134268	CYGB	Homo sapiens cytoglobin (CYGB), mRNA [NM_134268]	chr17	2.549	2.549	9.067e-03
NM_001098668	SFTPA2	Homo sapiens surfactant protein A2 (SFTPA2), mRNA [NM_001098668]	chr10	10.495	10.495	9.114e-03
A_33_P3326817	A_33_P3326817	Unknown	chr2	6.155	6.155	9.180e-03
NM_007021	C10orf10	Homo sapiens chromosome 10 open reading frame 10 (C10orf10), mRNA [NM_007021]	chr10	2.274	2.274	9.252e-03
ENST00000412800	XLOC_006446	BROAD Institute lincRNA (XLOC_006446), lincRNA [TCONS_00013173]	chr7	6.905	6.905	9.293e-03
NR_003500	RP9P	Homo sapiens retinitis pigmentosa 9 pseudogene (RP9P), non-coding RNA [NR_003500]	chr7	2.234	2.234	9.501e-03
NM_001197218	PDE4D	Homo sapiens phosphodiesterase 4D, cAMP-specific (PDE4D), transcript variant 4, mRNA [NM_001197218]	chr5	0.487	-2.055	9.510e-03
NM_001013653	LRRC26	Homo sapiens leucine rich repeat containing 26 (LRRC26), mRNA [NM_001013653]	chr9	3.409	3.409	9.949e-03
NM_001142641	FBRSL1	Homo sapiens fibrosin-like 1 (FBRSL1), mRNA [NM_001142641]	chr12	4.788	4.788	9.951e-03
NR_027129	C21orf67	Homo sapiens chromosome 21 open reading frame 67 (C21orf67), transcript variant 2, non-coding RNA [NR_027129]	chr21	2.063	2.063	1.004e-02
NM_001144936	C11orf95	Homo sapiens chromosome 11 open reading frame 95 (C11orf95), mRNA [NM_001144936]	chr11	3.821	3.821	1.054e-02
NM_198440	DERL3	Homo sapiens Der1-like domain family, member 3 (DERL3), transcript variant 3, mRNA [NM_198440]	chr22	5.179	5.179	1.057e-02
NM_006633	IQGAP2	Homo sapiens IQ motif containing GTPase activating protein 2 (IQGAP2), mRNA [NM_006633]	chr5	2.276	2.276	1.057e-02
NM_001204513	RBAK-LOC389458	Homo sapiens RBAK-LOC389458 readthrough (RBAK-LOC389458), mRNA [NM_001204513]	chr7	11.04	11.04	1.112e-02
NM_020630	RET	Homo sapiens ret proto-oncogene (RET), transcript variant 4, mRNA [NM_020630]	chr10	3.835	3.835	1.112e-02
NM_022346	NCAPG	Homo sapiens non-SMC condensin I complex, subunit G (NCAPG), mRNA [NM_022346]	chr4	0.493	-2.026	1.136e-02
TCONS_00008906	XLOC_003739	BROAD Institute lincRNA (XLOC_003739), lincRNA [TCONS_00008906]	chr4	2.741	2.741	1.203e-02
NR_033789	SPRNP1	Homo sapiens shadow of prion protein homolog (zebrafish) pseudogene 1 (SPRNP1), non-coding RNA [NR_033789]	chr10	8.335	8.335	1.214e-02
NM_080862	SPSB4	Homo sapiens splA/ryanodine receptor domain and SOCS box containing 4 (SPSB4), mRNA [NM_080862]	chr3	6.414	6.414	1.218e-02
NM_015075	IQSEC2	Homo sapiens IQ motif and Sec7 domain 2 (IQSEC2), transcript variant 2, mRNA [NM_015075]	chrX	6.641	6.641	1.223e-02
NM_000616	CD4	Homo sapiens CD4 molecule (CD4), transcript variant 1, mRNA [NM_000616]	chr12	7.62	7.62	1.235e-02
THC2676251	XLOC_006188	BROAD Institute lincRNA (XLOC_006188), lincRNA [TCONS_00014179]	chr7	9.703	9.703	1.240e-02
NM_000391	TPP1	Homo sapiens tripeptidyl peptidase I (TPP1), mRNA [NM_000391]	chr11	2.989	2.989	1.260e-02
NR_038301	LOC100505687	Homo sapiens uncharacterized LOC100505687 (LOC100505687), transcript variant 1, non-coding RNA [NR_038301]	chr3	5	5	1.271e-02
TCONS_00004944	XLOC_001747	BROAD Institute lincRNA (XLOC_001747), lincRNA [TCONS_00004944]	chr2	11.266	11.266	1.278e-02
NM_001184997	RNF32	Homo sapiens ring finger protein 32 (RNF32), transcript variant 2, mRNA [NM_001184997]	chr7	4.812	4.812	1.279e-02
ENST00000463107	ENST00000463107	Novel proteinUncharacterized protein [Source:UniProtKB/TrEMBL;Acc:A6ZJ83] [ENST00000463107]	chr22	9.259	9.259	1.286e-02
NM_006212	PFKFB2	Homo sapiens 6-phosphofructo-2-kinase/fructose-2,6-biphosphatase 2 (PFKFB2), transcript variant 1, mRNA [NM_006212]	chr1	2.862	2.862	1.294e-02
NM_020695	REXO1	Homo sapiens REX1, RNA exonuclease 1 homolog (S. cerevisiae) (REXO1), mRNA [NM_020695]	chr19	2.309	2.309	1.338e-02
BC033982	ARAF2P	Homo sapiens v-raf murine sarcoma 3611 viral oncogene homolog pseudogene, mRNA (cDNA clone IMAGE:5295529). [BC033982]	chr7	3.869	3.869	1.343e-02
NM_002626	PFKL	Homo sapiens phosphofructokinase, liver (PFKL), transcript variant 2, mRNA [NM_002626]	chr21	9.801	9.801	1.351e-02
NR_034182	LOC100129196	Homo sapiens uncharacterized LOC100129196 (LOC100129196), non-coding RNA [NR_034182]	chr1	4.804	4.804	1.354e-02
NM_003456	ZNF205	Homo sapiens zinc finger protein 205 (ZNF205), transcript variant 1, mRNA [NM_003456]	chr16	26.09	26.09	1.374e-02
ENST00000507296	ENST00000507296	Unknown	chr4	4.002	4.002	1.386e-02
AB007954	KIAA0485	Homo sapiens mRNA, chromosome 1 specific transcript KIAA0485. [AB007954]	chr1	0.427	-2.345	1.403e-02
NM_080611	DUSP15	Homo sapiens dual specificity phosphatase 15 (DUSP15), transcript variant 1, mRNA [NM_080611]	chr20	10.05	10.05	1.417e-02
A_33_P3408665	A_33_P3408665	Unknown	chrUn_gl000217	7.03	7.03	1.417e-02
NR_029411	LOC100133091	Homo sapiens uncharacterized LOC100133091 (LOC100133091), non-coding RNA [NR_029411]	chr7	2.357	2.357	1.417e-02
AL512723	DKFZP547L112	Homo sapiens mRNA; cDNA DKFZp547L112 (from clone DKFZp547L112). [AL512723]	chr15	14.92	14.92	1.430e-02
NM_025045	BAIAP2L2	Homo sapiens BAI1-associated protein 2-like 2 (BAIAP2L2), mRNA [NM_025045]	chr22	8.164	8.164	1.430e-02
NM_178351	LCE1C	Homo sapiens late cornified envelope 1C (LCE1C), mRNA [NM_178351]	chr1	5.393	5.393	1.430e-02
NR_024567	LOC100130557	Homo sapiens uncharacterized LOC100130557 (LOC100130557), non-coding RNA [NR_024567]	chr1	16.612	16.612	1.430e-02
NM_145287	ZNF519	Homo sapiens zinc finger protein 519 (ZNF519), transcript variant 1, mRNA [NM_145287]	chr18	0.489	-2.044	1.452e-02
NR_040253	LOC282980	Homo sapiens uncharacterized LOC282980 (LOC282980), non-coding RNA [NR_040253]	chr10	2.167	2.167	1.462e-02
NM_001025200	CTRB2	Homo sapiens chymotrypsinogen B2 (CTRB2), mRNA [NM_001025200]	chr16	11.04	11.04	1.509e-02
NM_018951	HOXA10	Homo sapiens homeobox A10 (HOXA10), transcript variant 1, mRNA [NM_018951]	chr7	11.602	11.602	1.546e-02
TCONS_00011978	XLOC_005488	BROAD Institute lincRNA (XLOC_005488), lincRNA [TCONS_00011978]	chr6	0.482	-2.076	1.554e-02
NM_153334	SCARF2	Homo sapiens scavenger receptor class F, member 2 (SCARF2), transcript variant 1, mRNA [NM_153334]	chr22	18.523	18.523	1.557e-02
NM_206818	OSCAR	Homo sapiens osteoclast associated, immunoglobulin-like receptor (OSCAR), transcript variant 1, mRNA [NM_206818]	chr19	16.044	16.044	1.583e-02
BF570948	SNAR-C4	602076150F1 NIH_MGC_62 Homo sapiens cDNA clone IMAGE:4243164 5', mRNA sequence [BF570948]	unmapped	2.444	2.444	1.617e-02
NM_001145638	GPSM1	Homo sapiens G-protein signaling modulator 1 (GPSM1), transcript variant 1, mRNA [NM_001145638]	chr9	4.653	4.653	1.638e-02
DJ031154	XLOC_l2_004817	ALU5_HUMAN (P39192) Alu subfamily SC sequence contamination warning entry, partial (5%) [THC2638933]	chr15	5.2	5.2	1.655e-02
ENST00000509548	XLOC_003776	BROAD Institute lincRNA (XLOC_003776), lincRNA [TCONS_00007680]	chr4	2.104	2.104	1.665e-02
TCONS_00026229	XLOC_012605	BROAD Institute lincRNA (XLOC_012605), lincRNA [TCONS_00026229]	chr18	0.481	-2.08	1.670e-02
AK123720	LOC100128107	Homo sapiens cDNA FLJ41726 fis, clone HLUNG2014449. [AK123720]	chr19	3.498	3.498	1.677e-02
BC137009	BC137009	Homo sapiens chromosome 19 open reading frame 31, mRNA (cDNA clone MGC:168625 IMAGE:9021002), complete cds. [BC137009]	chr19	10.881	10.881	1.682e-02
NM_001164741	ARHGAP4	Homo sapiens Rho GTPase activating protein 4 (ARHGAP4), transcript variant 1, mRNA [NM_001164741]	chrX	5.25	5.25	1.722e-02
NM_001101320	SERPINE3	Homo sapiens serpin peptidase inhibitor, clade E (nexin, plasminogen activator inhibitor type 1), member 3 (SERPINE3), mRNA [NM_001101320]	chr13	2.165	2.165	1.727e-02
NM_001113755	TYMP	Homo sapiens thymidine phosphorylase (TYMP), transcript variant 1, mRNA [NM_001113755]	chr22	2.108	2.108	1.745e-02
AF336885	AF336885	Homo sapiens FKSG58 (FKSG58) mRNA, complete cds. [AF336885]	chr11	4.605	4.605	1.745e-02
A_33_P3271126	A_33_P3271126	Unknown	chr19	7.675	7.675	1.753e-02
NM_001162435	LOC100287718	Homo sapiens ankyrin repeat domain containing gene (LOC100287718), mRNA [NM_001162435]	chr6	2.633	2.633	1.777e-02
NR_027345	LINC00173	Homo sapiens long intergenic non-protein coding RNA 173 (LINC00173), transcript variant 1, non-coding RNA [NR_027345]	chr12	7.443	7.443	1.780e-02
ENST00000455671	XLOC_009023	GB	chr11	18.589	18.589	1.787e-02
ENST00000450157	ENST00000450157	Q5TGA2_HUMAN (Q5TGA2) Peptidylprolyl isomerase E (Cyclophilin E), partial (29%) [THC2586785]	chr1	6.178	6.178	1.793e-02
NM_144579	SFXN5	Homo sapiens sideroflexin 5 (SFXN5), nuclear gene encoding mitochondrial protein, mRNA [NM_144579]	chr2	6.441	6.441	1.820e-02
A_33_P3358109	A_33_P3358109	Unknown	chr16	2.53	2.53	1.822e-02
NM_033184	KRTAP2-4	Homo sapiens keratin associated protein 2-4 (KRTAP2-4), mRNA [NM_033184]	chr17	8.184	8.184	1.828e-02
ENST00000523812	GLI4	GLI family zinc finger 4 [Source:HGNC Symbol;Acc:4320] [ENST00000523812]	chr8	4.605	4.605	1.829e-02
NM_001077186	MYH14	Homo sapiens myosin, heavy chain 14, non-muscle (MYH14), transcript variant 1, mRNA [NM_001077186]	chr19	4.96	4.96	1.831e-02
ENST00000457865	HIF3A	hypoxia inducible factor 3, alpha subunit [Source:HGNC Symbol;Acc:15825] [ENST00000457865]	chr19	3.588	3.588	1.871e-02
NM_001190467	FLJ22184	Homo sapiens putative uncharacterized protein FLJ22184 (FLJ22184), mRNA [NM_001190467]	chr19	3.576	3.576	1.901e-02
AK124556	LOC100132966	Homo sapiens cDNA FLJ42565 fis, clone BRACE3007472. [AK124556]	chr1	8.738	8.738	1.918e-02
ENST00000367716	ENST00000367716	Unknown	chr1	4.856	4.856	1.959e-02
NM_004679	VCY	Homo sapiens variable charge, Y-linked (VCY), mRNA [NM_004679]	chrY	2.274	2.274	1.972e-02
XR_110532	LOC100128242	PREDICTED: Homo sapiens hypothetical LOC100128242 (LOC100128242), miscRNA [XR_110532]	chr11	2.07	2.07	1.999e-02
NM_001145664	RFX8	Homo sapiens regulatory factor X, 8 (RFX8), mRNA [NM_001145664]	chr2	2.385	2.385	2.040e-02
NM_012467	TPSG1	Homo sapiens tryptase gamma 1 (TPSG1), mRNA [NM_012467]	chr16	2.601	2.601	2.068e-02
NM_012182	FOXB1	Homo sapiens forkhead box B1 (FOXB1), mRNA [NM_012182]	chr15	21.394	21.394	2.095e-02
NM_030966	KRTAP1-3	Homo sapiens keratin associated protein 1-3 (KRTAP1-3), mRNA [NM_030966]	chr17	2.031	2.031	2.096e-02
TCONS_l2_00010603	XLOC_l2_005692	BROAD Institute lincRNA (XLOC_l2_005692), lincRNA [TCONS_l2_00010603]	chr17	3.436	3.436	2.123e-02
NM_001080483	TMEM8C	Homo sapiens transmembrane protein 8C (TMEM8C), mRNA [NM_001080483]	chr9	4.878	4.878	2.137e-02
ENST00000412420	XLOC_008236	Q3TS54_MOUSE (Q3TS54) In vitro fertilized eggs cDNA, RIKEN full-length enriched library, clone:7420485E05 product:zinc finger protein 58, full insert sequence. (Fragment), partial (6%) [THC2781167]	chrX	26.766	26.766	2.170e-02
NM_052854	CREB3L1	Homo sapiens cAMP responsive element binding protein 3-like 1 (CREB3L1), mRNA [NM_052854]	chr11	4.118	4.118	2.178e-02
ENST00000500161	ZNF329	zinc finger protein 329 [Source:HGNC Symbol;Acc:14209] [ENST00000500161]	chr19	7.137	7.137	2.191e-02
NM_016155	MMP17	Homo sapiens matrix metallopeptidase 17 (membrane-inserted) (MMP17), mRNA [NM_016155]	chr12	11.418	11.418	2.196e-02
NM_182961	SYNE1	Homo sapiens spectrin repeat containing, nuclear envelope 1 (SYNE1), transcript variant 1, mRNA [NM_182961]	chr6	3.335	3.335	2.205e-02
NM_024324	CRELD2	Homo sapiens cysteine-rich with EGF-like domains 2 (CRELD2), transcript variant 2, mRNA [NM_024324]	chr22	2.692	2.692	2.210e-02
NM_175887	PRR15	Homo sapiens proline rich 15 (PRR15), mRNA [NM_175887]	chr7	2.108	2.108	2.210e-02
NR_038359	MGC45922	Homo sapiens uncharacterized LOC284365 (MGC45922), non-coding RNA [NR_038359]	chr19	8.413	8.413	2.218e-02
NR_024563	LOC100130238	Homo sapiens uncharacterized LOC100130238 (LOC100130238), non-coding RNA [NR_024563]	chr12	14.811	14.811	2.255e-02
ENST00000366877	SUSD4	sushi domain containing 4 [Source:HGNC Symbol;Acc:25470] [ENST00000366877]	chr1	6.508	6.508	2.256e-02
A_33_P3277805	A_33_P3277805	Unknown	chr15	10.372	10.372	2.262e-02
THC2500351	XLOC_l2_004844	ALU1_HUMAN (P39188) Alu subfamily J sequence contamination warning entry, partial (8%) [THC2500351]	chr15	2.318	2.318	2.264e-02
THC2725851	THC2725851	Unknown	chr7_gl000195_random	0.471	-2.122	2.273e-02
NM_001031737	CCDC78	Homo sapiens coiled-coil domain containing 78 (CCDC78), mRNA [NM_001031737]	chr16	10.342	10.342	2.291e-02
A_33_P3218741	A_33_P3218741	Unknown	chr15	4.245	4.245	2.291e-02
XR_109177	LOC390660	PREDICTED: Homo sapiens FLJ00317 protein (LOC390660), miscRNA [XR_109177]	chr15	5.462	5.462	2.356e-02
AK131345	AK131345	Homo sapiens cDNA FLJ16364 fis, clone THYMU2032976. [AK131345]	chr7	0.385	-2.594	2.357e-02
NM_001134434	SPOCK2	Homo sapiens sparc/osteonectin, cwcv and kazal-like domains proteoglycan (testican) 2 (SPOCK2), transcript variant 1, mRNA [NM_001134434]	chr10	2.157	2.157	2.357e-02
NM_001204265	NR3C1	Homo sapiens nuclear receptor subfamily 3, group C, member 1 (glucocorticoid receptor) (NR3C1), transcript variant 8, mRNA [NM_001204265]	chr5	0.48	-2.084	2.358e-02
ENST00000400768	ENST00000400768	Unknown	chr2	2.477	2.477	2.418e-02
NM_002333	LRP3	Homo sapiens low density lipoprotein receptor-related protein 3 (LRP3), mRNA [NM_002333]	chr19	7.247	7.247	2.443e-02
NM_020376	PNPLA2	Homo sapiens patatin-like phospholipase domain containing 2 (PNPLA2), mRNA [NM_020376]	chr11	5.581	5.581	2.447e-02
NM_001146340	NKX1-2	Homo sapiens NK1 homeobox 2 (NKX1-2), mRNA [NM_001146340]	chr10	22.892	22.892	2.478e-02
TCONS_l2_00006892	XLOC_l2_003758	BROAD Institute lincRNA (XLOC_l2_003758), lincRNA [TCONS_l2_00006892]	chr13	5.722	5.722	2.495e-02
NM_001100915	KCTD19	Homo sapiens potassium channel tetramerisation domain containing 19 (KCTD19), mRNA [NM_001100915]	chr16	17.402	17.402	2.581e-02
ENST00000423349	XLOC_008791	BX107643 Soares_testis_NHT Homo sapiens cDNA clone IMAGp998J243558, mRNA sequence [BX107643]	chr10	2.002	2.002	2.587e-02
NM_138433	KLHDC7B	Homo sapiens kelch domain containing 7B (KLHDC7B), mRNA [NM_138433]	chr22	2.064	2.064	2.589e-02
BM918074	SNORA71A	AGENCOURT_6611325 NIH_MGC_106 Homo sapiens cDNA clone IMAGE:5485440 5', mRNA sequence [BM918074]	chr20	12.317	12.317	2.597e-02
NM_001242829	IP6K1	Homo sapiens inositol hexakisphosphate kinase 1 (IP6K1), transcript variant 3, mRNA [NM_001242829]	chr3	3.845	3.845	2.613e-02
ENST00000505713	PPA2	pyrophosphatase (inorganic) 2 [Source:HGNC Symbol;Acc:28883] [ENST00000505713]	chr4	5.432	5.432	2.632e-02
TCONS_00014180	XLOC_006188	BROAD Institute lincRNA (XLOC_006188), lincRNA [TCONS_00014180]	chr7	8.423	8.423	2.657e-02
NM_001134430	TOR2A	Homo sapiens torsin family 2, member A (TOR2A), transcript variant 3, mRNA [NM_001134430]	chr9	8.728	8.728	2.663e-02
NM_015722	CALY	Homo sapiens calcyon neuron-specific vesicular protein (CALY), mRNA [NM_015722]	chr10	2.827	2.827	2.678e-02
ENST00000456890	LOC100506447	TXTP_HUMAN (P53007) Tricarboxylate transport protein, mitochondrial precursor (Citrate transport protein) (CTP) (Tricarboxylate carrier protein) (Solute carrier family 25 member 1), partial (51%) [THC2480033]	chr7	16.958	16.958	2.690e-02
ENST00000378430	CD72	CD72 molecule [Source:HGNC Symbol;Acc:1696] [ENST00000378430]	chr9	5.658	5.658	2.723e-02
BC133006	FLJ40606	Homo sapiens hypothetical protein LOC643549, mRNA (cDNA clone IMAGE:40147028). [BC133006]	chr20	3.163	3.163	2.757e-02
ENST00000324659	NLRC3	NLR family, CARD domain containing 3 [Source:HGNC Symbol;Acc:29889] [ENST00000324659]	chr16	7.664	7.664	2.769e-02
NM_145343	APOL1	Homo sapiens apolipoprotein L, 1 (APOL1), transcript variant 2, mRNA [NM_145343]	chr22	19.313	19.313	2.828e-02
XR_132623	LOC728054	PREDICTED: Homo sapiens hypothetical LOC728054 (LOC728054), miscRNA [XR_132623]	chr16	4.095	4.095	2.828e-02
NM_033256	PPP1R14A	Homo sapiens protein phosphatase 1, regulatory (inhibitor) subunit 14A (PPP1R14A), transcript variant 1, mRNA [NM_033256]	chr19	2.687	2.687	2.836e-02
NM_018674	ACCN4	Homo sapiens amiloride-sensitive cation channel 4, pituitary (ACCN4), transcript variant 1, mRNA [NM_018674]	chr2	3.356	3.356	2.847e-02
A_33_P3365963	A_33_P3365963	Unknown	chr4	13.094	13.094	2.868e-02
ENST00000503572	XLOC_003245	BROAD Institute lincRNA (XLOC_003245), lincRNA [TCONS_00005826]	chr3	16.901	16.901	2.877e-02
NM_030883	OR2H1	Homo sapiens olfactory receptor, family 2, subfamily H, member 1 (OR2H1), mRNA [NM_030883]	chr6	2.876	2.876	2.878e-02
AK091697	AK091697	Homo sapiens cDNA FLJ34378 fis, clone FEBRA2018051. [AK091697]	chr8	3.41	3.41	2.878e-02
A_33_P3373795	A_33_P3373795	Unknown	chr12	2.149	2.149	2.888e-02
ENST00000482292	PFDN6	prefoldin subunit 6 [Source:HGNC Symbol;Acc:4926] [ENST00000482292]	chr6	25.374	25.374	2.889e-02
NM_001004125	TUSC1	Homo sapiens tumor suppressor candidate 1 (TUSC1), mRNA [NM_001004125]	chr9	13.722	13.722	2.894e-02
NM_005304	FFAR3	Homo sapiens free fatty acid receptor 3 (FFAR3), mRNA [NM_005304]	chr19	2.095	2.095	2.901e-02
NM_007046	EMILIN1	Homo sapiens elastin microfibril interfacer 1 (EMILIN1), mRNA [NM_007046]	chr2	9.076	9.076	2.928e-02
NM_012451	SYNGR4	Homo sapiens synaptogyrin 4 (SYNGR4), mRNA [NM_012451]	chr19	3.744	3.744	2.948e-02
NM_052863	SCGB3A1	Homo sapiens secretoglobin, family 3A, member 1 (SCGB3A1), mRNA [NM_052863]	chr5	6.76	6.76	2.975e-02
ENST00000430650	Q6UXP8	Q6UXP8_HUMAN (Q6UXP8) NGNL6975, partial (46%) [THC2509833]	chr2	2.063	2.063	2.996e-02
NM_172109	KCNQ2	Homo sapiens potassium voltage-gated channel, KQT-like subfamily, member 2 (KCNQ2), transcript variant 5, mRNA [NM_172109]	chr20	7.042	7.042	3.043e-02
THC2767054	THC2767054	1509333A NEM sensitive fusion protein. {Cricetulus griseus} (exp=-1; wgp=0; cg=0), partial (25%) [THC2767054]	chr17	0.381	-2.624	3.071e-02
NM_001098482	CRTC1	Homo sapiens CREB regulated transcription coactivator 1 (CRTC1), transcript variant 3, mRNA [NM_001098482]	chr19	6.159	6.159	3.094e-02
NM_014940	MON1B	Homo sapiens MON1 homolog B (yeast) (MON1B), mRNA [NM_014940]	chr16	14.375	14.375	3.116e-02
NM_003967	TAAR5	Homo sapiens trace amine associated receptor 5 (TAAR5), mRNA [NM_003967]	chr6	6.072	6.072	3.130e-02
NM_024519	FAM65A	Homo sapiens family with sequence similarity 65, member A (FAM65A), transcript variant 1, mRNA [NM_024519]	chr16	2.138	2.138	3.146e-02
NR_038318	LOC100526771	Homo sapiens uncharacterized LOC100526771 (LOC100526771), non-coding RNA [NR_038318]	chr11	7.579	7.579	3.156e-02
ENST00000370177	PPDPF	pancreatic progenitor cell differentiation and proliferation factor homolog (zebrafish) [Source:HGNC Symbol;Acc:16142] [ENST00000370177]	chr20	8.853	8.853	3.172e-02
A_33_P3266614	A_33_P3266614	Unknown	chr21	23.927	23.927	3.172e-02
NM_001190764	TMEM238	Homo sapiens transmembrane protein 238 (TMEM238), mRNA [NM_001190764]	chr19	5.656	5.656	3.188e-02
TCONS_00008697	XLOC_004211	BROAD Institute lincRNA (XLOC_004211), lincRNA [TCONS_00008697]	chr4	2.19	2.19	3.198e-02
ENST00000378340	ENST00000378340	Uncharacterized proteincDNA FLJ27068 fis, clone SPL01475 [Source:UniProtKB/TrEMBL;Acc:Q6ZNV2] [ENST00000378340]	chr16	3.467	3.467	3.212e-02
AF258587	LOC645261	Homo sapiens PP565 mRNA, complete cds. [AF258587]	chr5	2.389	2.389	3.216e-02
NM_007139	ZNF92	Homo sapiens zinc finger protein 92 (ZNF92), transcript variant 1, mRNA [NM_007139]	chr7	0.467	-2.142	3.220e-02
ENST00000317419	RABGAP1	RAB GTPase activating protein 1 [Source:HGNC Symbol;Acc:17155] [ENST00000317419]	chr9	0.449	-2.229	3.233e-02
A_33_P3218564	A_33_P3218564	Unknown	chr14	3.863	3.863	3.258e-02
TCONS_00001247	XLOC_000529	BROAD Institute lincRNA (XLOC_000529), lincRNA [TCONS_00001247]	chr1	2.336	2.336	3.267e-02
NM_032304	HAGHL	Homo sapiens hydroxyacylglutathione hydrolase-like (HAGHL), transcript variant 2, mRNA [NM_032304]	chr16	2.736	2.736	3.291e-02
NM_003484	HMGA2	Homo sapiens high mobility group AT-hook 2 (HMGA2), transcript variant 2, mRNA [NM_003484]	chr12	11.209	11.209	3.303e-02
NM_017431	PRKAG3	Homo sapiens protein kinase, AMP-activated, gamma 3 non-catalytic subunit (PRKAG3), mRNA [NM_017431]	chr2	2.013	2.013	3.304e-02
A_33_P3386147	A_33_P3386147	Unknown	chr11	2.049	2.049	3.306e-02
NM_013271	PCSK1N	Homo sapiens proprotein convertase subtilisin/kexin type 1 inhibitor (PCSK1N), mRNA [NM_013271]	chrX	11.399	11.399	3.335e-02
NM_145057	CDC42EP5	Homo sapiens CDC42 effector protein (Rho GTPase binding) 5 (CDC42EP5), mRNA [NM_145057]	chr19	3.249	3.249	3.343e-02
XR_109361	LOC100130876	PREDICTED: Homo sapiens hypothetical LOC100130876 (LOC100130876), miscRNA [XR_109361]	chr17	0.495	-2.022	3.365e-02
A_33_P3303394	A_33_P3303394	Unknown	chr17	4.496	4.496	3.380e-02
NR_027686	LINC00176	Homo sapiens long intergenic non-protein coding RNA 176 (LINC00176), transcript variant 1, non-coding RNA [NR_027686]	chr20	11.666	11.666	3.408e-02
AK057884	AK057884	Homo sapiens cDNA FLJ25155 fis, clone CBR07976. [AK057884]	chr13	5.045	5.045	3.408e-02
XR_109186	LOC100505769	PREDICTED: Homo sapiens hypothetical LOC100505769 (LOC100505769), miscRNA [XR_109186]	chr15	2.172	2.172	3.437e-02
NR_029401	LOC731275	Homo sapiens uncharacterized LOC731275 (LOC731275), non-coding RNA [NR_029401]	chr1	2.031	2.031	3.438e-02
XR_109856	C9orf62	PREDICTED: Homo sapiens chromosome 9 open reading frame 62 (C9orf62), miscRNA [XR_109856]	chr9	5.428	5.428	3.444e-02
NM_001242704	ZNF385C	Homo sapiens zinc finger protein 385C (ZNF385C), mRNA [NM_001242704]	chr17	6.217	6.217	3.550e-02
TCONS_00028091	XLOC_013436	BROAD Institute lincRNA (XLOC_013436), lincRNA [TCONS_00028091]	chr20	7.899	7.899	3.551e-02
NM_017436	A4GALT	Homo sapiens alpha 1,4-galactosyltransferase (A4GALT), mRNA [NM_017436]	chr22	6.298	6.298	3.565e-02
NM_001145777	FKBP5	Homo sapiens FK506 binding protein 5 (FKBP5), transcript variant 4, mRNA [NM_001145777]	chr6	0.396	-2.527	3.576e-02
NM_199425	VSX1	Homo sapiens visual system homeobox 1 (VSX1), transcript variant 2, mRNA [NM_199425]	chr20	3.685	3.685	3.628e-02
TCONS_00027083	XLOC_013124	BROAD Institute lincRNA (XLOC_013124), lincRNA [TCONS_00027083]	chr19	2.11	2.11	3.634e-02
ENST00000390293	ENST00000390293	immunoglobulin lambda variable 5-48 (non-functional) [Source:HGNC Symbol;Acc:5925] [ENST00000390293]	chr22	7.727	7.727	3.644e-02
NM_080606	BHLHE23	Homo sapiens basic helix-loop-helix family, member e23 (BHLHE23), mRNA [NM_080606]	chr20	8.422	8.422	3.649e-02
AK124397	LOC100128727	Homo sapiens cDNA FLJ42406 fis, clone ASTRO3000482. [AK124397]	chr7	2.241	2.241	3.656e-02
NM_198537	YJEFN3	Homo sapiens YjeF N-terminal domain containing 3 (YJEFN3), nuclear gene encoding mitochondrial protein, transcript variant 1, mRNA [NM_198537]	chr19	11.058	11.058	3.665e-02
NM_001007125	C20orf201	Homo sapiens chromosome 20 open reading frame 201 (C20orf201), mRNA [NM_001007125]	chr20	7.942	7.942	3.672e-02
NM_005195	CEBPD	Homo sapiens CCAAT/enhancer binding protein (C/EBP), delta (CEBPD), mRNA [NM_005195]	chr8	7.506	7.506	3.711e-02
NM_018942	HMX1	Homo sapiens H6 family homeobox 1 (HMX1), mRNA [NM_018942]	chr4	8.844	8.844	3.738e-02
NR_024424	LOC255167	Homo sapiens uncharacterized LOC255167 (LOC255167), non-coding RNA [NR_024424]	chr5	12.98	12.98	3.746e-02
NM_002281	KRT81	Homo sapiens keratin 81 (KRT81), mRNA [NM_002281]	chr12	2.527	2.527	3.759e-02
ENST00000408913	ZFP36L1	zinc finger protein 36, C3H type-like 1 [Source:HGNC Symbol;Acc:1107] [ENST00000408913]	chr14	2.777	2.777	3.763e-02
NM_207336	ZNF467	Homo sapiens zinc finger protein 467 (ZNF467), mRNA [NM_207336]	chr7	3.709	3.709	3.799e-02
NM_133452	RAVER1	Homo sapiens ribonucleoprotein, PTB-binding 1 (RAVER1), mRNA [NM_133452]	chr19	10.735	10.735	3.818e-02
XR_132713	LOC100507149	PREDICTED: Homo sapiens hypothetical LOC100507149 (LOC100507149), miscRNA [XR_132713]	chr3	0.498	-2.007	3.837e-02
NM_178460	SIRPD	Homo sapiens signal-regulatory protein delta (SIRPD), mRNA [NM_178460]	chr20	2.113	2.113	3.871e-02
NM_144644	SPATA4	Homo sapiens spermatogenesis associated 4 (SPATA4), mRNA [NM_144644]	chr4	2.032	2.032	3.871e-02
NR_003367	PVT1	Homo sapiens Pvt1 oncogene (non-protein coding) (PVT1), non-coding RNA [NR_003367]	chr8	5.342	5.342	3.871e-02
NM_024511	HAUS3	Homo sapiens HAUS augmin-like complex, subunit 3 (HAUS3), mRNA [NM_024511]	chr4	0.36	-2.777	3.871e-02
NM_002824	PTMS	Homo sapiens parathymosin (PTMS), mRNA [NM_002824]	chr12	2.163	2.163	3.879e-02
NM_003961	RHBDL1	Homo sapiens rhomboid, veinlet-like 1 (Drosophila) (RHBDL1), mRNA [NM_003961]	chr16	7.556	7.556	3.919e-02
NM_138415	PHF21B	Homo sapiens PHD finger protein 21B (PHF21B), transcript variant 1, mRNA [NM_138415]	chr22	2.074	2.074	3.924e-02
NM_198699	KRTAP10-12	Homo sapiens keratin associated protein 10-12 (KRTAP10-12), mRNA [NM_198699]	chr21	4.481	4.481	3.938e-02
ENST00000503050	MAML1	mastermind-like 1 (Drosophila) [Source:HGNC Symbol;Acc:13632] [ENST00000503050]	chr5	2.257	2.257	3.950e-02
NM_178449	PTH2	Homo sapiens parathyroid hormone 2 (PTH2), mRNA [NM_178449]	chr19	8.359	8.359	3.950e-02
NM_199180	KIRREL2	Homo sapiens kin of IRRE like 2 (Drosophila) (KIRREL2), transcript variant 3, mRNA [NM_199180]	chr19	8.842	8.842	3.954e-02
THC2753069	THC2753069	Q39AC8_BURS3 (Q39AC8) Cytochrome B561, partial (9%) [THC2753069]	chr17	6.541	6.541	3.977e-02
A_33_P3319937	A_33_P3319937	Unknown	chr8	5.64	5.64	3.997e-02
A_33_P3347522	A_33_P3347522	Unknown	chr16	3.06	3.06	4.055e-02
NM_001128636	ELFN1	Homo sapiens extracellular leucine-rich repeat and fibronectin type III domain containing 1 (ELFN1), mRNA [NM_001128636]	chr7	5.228	5.228	4.057e-02
NM_001166175	NKX2-5	Homo sapiens NK2 homeobox 5 (NKX2-5), transcript variant 2, mRNA [NM_001166175]	chr5	2.564	2.564	4.070e-02
NM_022555	HLA-DRB3	Homo sapiens major histocompatibility complex, class II, DR beta 3 (HLA-DRB3), mRNA [NM_022555]	unmapped	2.694	2.694	4.081e-02
NM_021248	CDH22	Homo sapiens cadherin 22, type 2 (CDH22), mRNA [NM_021248]	chr20	2.567	2.567	4.116e-02
NM_001242310	EDA2R	Homo sapiens ectodysplasin A2 receptor (EDA2R), transcript variant 3, mRNA [NM_001242310]	chrX	2.173	2.173	4.138e-02
NM_001989	EVX1	Homo sapiens even-skipped homeobox 1 (EVX1), mRNA [NM_001989]	chr7	6.981	6.981	4.150e-02
NM_005775	SORBS3	Homo sapiens sorbin and SH3 domain containing 3 (SORBS3), transcript variant 1, mRNA [NM_005775]	chr8	4.738	4.738	4.172e-02
NM_001172630	ARHGAP33	Homo sapiens Rho GTPase activating protein 33 (ARHGAP33), transcript variant 2, mRNA [NM_001172630]	chr19	4.659	4.659	4.193e-02
A_33_P3414017	A_33_P3414017	Unknown	chr7	12.471	12.471	4.209e-02
THC2658074	XLOC_l2_003705	BROAD Institute lincRNA (XLOC_l2_003705), lincRNA [TCONS_l2_00006816]	chr13	3.915	3.915	4.238e-02
NM_015177	DTX4	Homo sapiens deltex homolog 4 (Drosophila) (DTX4), mRNA [NM_015177]	chr11	2.061	2.061	4.238e-02
NM_207401	C1orf229	Homo sapiens chromosome 1 open reading frame 229 (C1orf229), mRNA [NM_207401]	chr1	13.912	13.912	4.263e-02
ENST00000453579	XLOC_005887	RST15238 Athersys RAGE Library Homo sapiens cDNA, mRNA sequence [BG196029]	chr6	2.513	2.513	4.284e-02
NM_138929	DIABLO	Homo sapiens diablo, IAP-binding mitochondrial protein (DIABLO), nuclear gene encoding mitochondrial protein, transcript variant 3, mRNA [NM_138929]	chr12	2.481	2.481	4.284e-02
ENST00000421059	POR	P450 (cytochrome) oxidoreductase [Source:HGNC Symbol;Acc:9208] [ENST00000421059]	chr7	6.812	6.812	4.287e-02
NM_007346	OGFR	Homo sapiens opioid growth factor receptor (OGFR), mRNA [NM_007346]	chr20	4.964	4.964	4.380e-02
BM453041	SRGAP2P1	AGENCOURT_6387596 NIH_MGC_71 Homo sapiens cDNA clone IMAGE:5529651 5', mRNA sequence [BM453041]	unmapped	4.639	4.639	4.394e-02
ENST00000526934	XLOC_009578	BROAD Institute lincRNA (XLOC_009578), lincRNA [TCONS_00020140]	chr11	2.27	2.27	4.407e-02
NR_024178	LOC284100	Homo sapiens tyrosine 3-monooxygenase/tryptophan 5-monooxygenase activation protein, epsilon polypeptide pseudogene (LOC284100), non-coding RNA [NR_024178]	chr17	2.092	2.092	4.418e-02
TCONS_00012087	XLOC_005617	BROAD Institute lincRNA (XLOC_005617), lincRNA [TCONS_00012087]	chr6	10.871	10.871	4.421e-02
NM_017510	TMED9	Homo sapiens transmembrane emp24 protein transport domain containing 9 (TMED9), mRNA [NM_017510]	chr5	3.3	3.3	4.481e-02
TCONS_00022267	XLOC_010588	BROAD Institute lincRNA (XLOC_010588), lincRNA [TCONS_00022267]	chr13	12.665	12.665	4.483e-02
A_33_P3321682	A_33_P3321682	Unknown	chr2	5.081	5.081	4.485e-02
ENST00000420268	XLOC_006260	BROAD Institute lincRNA (XLOC_006260), lincRNA [TCONS_00013082]	chr7	11.064	11.064	4.504e-02
A_33_P3289976	A_33_P3289976	Unknown	chr9	3.185	3.185	4.510e-02
A_33_P3371144	A_33_P3371144	Unknown	chr17	11.724	11.724	4.543e-02
NM_148896	NPB	Homo sapiens neuropeptide B (NPB), mRNA [NM_148896]	chr17	14.679	14.679	4.543e-02
NM_014564	LHX3	Homo sapiens LIM homeobox 3 (LHX3), transcript variant 2, mRNA [NM_014564]	chr9	8.119	8.119	4.545e-02
NM_178348	LCE1A	Homo sapiens late cornified envelope 1A (LCE1A), mRNA [NM_178348]	chr1	2.19	2.19	4.545e-02
XM_003119857	LOC100509763	PREDICTED: Homo sapiens hypothetical protein LOC100509763 (LOC100509763), mRNA [XM_003119857]	chr2	2.388	2.388	4.575e-02
NM_001013638	PRR25	Homo sapiens proline rich 25 (PRR25), mRNA [NM_001013638]	chr16	8.955	8.955	4.582e-02
NM_001080461	UNCX	Homo sapiens UNC homeobox (UNCX), mRNA [NM_001080461]	chr7	11.172	11.172	4.595e-02
NR_003239	SNHG11	Homo sapiens small nucleolar RNA host gene 11 (non-protein coding) (SNHG11), non-coding RNA [NR_003239]	chr20	7.325	7.325	4.598e-02
NM_023946	LYNX1	Homo sapiens Ly6/neurotoxin 1 (LYNX1), transcript variant 1, mRNA [NM_023946]	chr8	8.581	8.581	4.601e-02
ENST00000438010	XLOC_l2_001592	full-length cDNA clone CS0DI009YC01 of Placenta Cot 25-normalized of Homo sapiens (human) [CR604707]	chr10	4.756	4.756	4.614e-02
AK127397	AK127397	Homo sapiens cDNA FLJ45488 fis, clone BRTHA2003759. [AK127397]	chr6	2.317	2.317	4.639e-02
NR_003680	RPL13AP17	Homo sapiens ribosomal protein L13a pseudogene 17 (RPL13AP17), non-coding RNA [NR_003680]	chr7	5.243	5.243	4.739e-02
NM_024794	EPHX3	Homo sapiens epoxide hydrolase 3 (EPHX3), transcript variant 1, mRNA [NM_024794]	chr19	3.527	3.527	4.746e-02
A_33_P3332627	A_33_P3332627	Unknown	chr7	4.67	4.67	4.780e-02
NM_020764	CASKIN1	Homo sapiens CASK interacting protein 1 (CASKIN1), mRNA [NM_020764]	chr16	4.914	4.914	4.787e-02
TCONS_00029116	XLOC_014066	BROAD Institute lincRNA (XLOC_014066), lincRNA [TCONS_00029116]	chr21	2.332	2.332	4.851e-02
NR_037169	LOC100507547	Homo sapiens uncharacterized LOC100507547 (LOC100507547), transcript variant 1, non-coding RNA [NR_037169]	chr6	7.588	7.588	4.868e-02
NM_207002	BCL2L11	Homo sapiens BCL2-like 11 (apoptosis facilitator) (BCL2L11), transcript variant 9, mRNA [NM_207002]	chr2	2.723	2.723	4.869e-02

## Sheet: EPI C2 treated vs vehicle
feature.ID	GeneSymbol	Description	Chr	Ratio	FC	Adj.P.value
NM_002089	CXCL2	Homo sapiens chemokine (C-X-C motif) ligand 2 (CXCL2), mRNA [NM_002089]	chr4	4.302	4.302	1.934e-09
NM_020299	AKR1B10	Homo sapiens aldo-keto reductase family 1, member B10 (aldose reductase) (AKR1B10), mRNA [NM_020299]	chr7	2.689	2.689	2.864e-08
NM_182908	DHRS2	Homo sapiens dehydrogenase/reductase (SDR family) member 2 (DHRS2), transcript variant 1, mRNA [NM_182908]	chr14	2.496	2.496	9.995e-08
NM_000358	TGFBI	Homo sapiens transforming growth factor, beta-induced, 68kDa (TGFBI), mRNA [NM_000358]	chr5	2.771	2.771	9.995e-08
NM_006398	UBD	Homo sapiens ubiquitin D (UBD), mRNA [NM_006398]	chr6	3.39	3.39	1.042e-07
NM_000304	PMP22	Homo sapiens peripheral myelin protein 22 (PMP22), transcript variant 1, mRNA [NM_000304]	chr17	0.448	-2.232	1.325e-07
NM_000014	A2M	Homo sapiens alpha-2-macroglobulin (A2M), mRNA [NM_000014]	chr12	2.528	2.528	1.325e-07
NM_002090	CXCL3	Homo sapiens chemokine (C-X-C motif) ligand 3 (CXCL3), mRNA [NM_002090]	chr4	2.839	2.839	1.325e-07
NM_080878	ITLN2	Homo sapiens intelectin 2 (ITLN2), mRNA [NM_080878]	chr1	2.531	2.531	1.866e-07
NM_002023	FMOD	Homo sapiens fibromodulin (FMOD), mRNA [NM_002023]	chr1	2.509	2.509	3.084e-07
NM_001423	EMP1	Homo sapiens epithelial membrane protein 1 (EMP1), mRNA [NM_001423]	chr12	2.436	2.436	3.377e-07
NM_052946	NOSTRIN	Homo sapiens nitric oxide synthase trafficker (NOSTRIN), transcript variant 1, mRNA [NM_052946]	chr2	3.087	3.087	8.538e-07
NM_001012631	IL32	Homo sapiens interleukin 32 (IL32), transcript variant 1, mRNA [NM_001012631]	chr16	3.047	3.047	1.161e-06
NM_002483	CEACAM6	Homo sapiens carcinoembryonic antigen-related cell adhesion molecule 6 (non-specific cross reacting antigen) (CEACAM6), mRNA [NM_002483]	chr19	2.183	2.183	1.236e-06
NR_033752	LOC344887	Homo sapiens NmrA-like family domain containing 1 pseudogene (LOC344887), non-coding RNA [NR_033752]	chr3	2.03	2.03	1.328e-06
NM_001657	AREG	Homo sapiens amphiregulin (AREG), mRNA [NM_001657]	chr4	2.252	2.252	1.486e-06
NM_020672	S100A14	Homo sapiens S100 calcium binding protein A14 (S100A14), mRNA [NM_020672]	chr1	2.702	2.702	1.486e-06
NM_001080538	AKR1B15	Homo sapiens aldo-keto reductase family 1, member B15 (AKR1B15), mRNA [NM_001080538]	chr7	2.652	2.652	1.486e-06
NM_033306	CASP4	Homo sapiens caspase 4, apoptosis-related cysteine peptidase (CASP4), transcript variant gamma, mRNA [NM_033306]	chr11	2.189	2.189	1.887e-06
NM_014767	SPOCK2	Homo sapiens sparc/osteonectin, cwcv and kazal-like domains proteoglycan (testican) 2 (SPOCK2), transcript variant 2, mRNA [NM_014767]	chr10	2.565	2.565	1.900e-06
NM_007173	PRSS23	Homo sapiens protease, serine, 23 (PRSS23), mRNA [NM_007173]	chr11	3.028	3.028	2.941e-06
NM_002305	LGALS1	Homo sapiens lectin, galactoside-binding, soluble, 1 (LGALS1), mRNA [NM_002305]	chr22	2.211	2.211	8.591e-06
NM_207627	ABCG1	Homo sapiens ATP-binding cassette, sub-family G (WHITE), member 1 (ABCG1), transcript variant 5, mRNA [NM_207627]	chr21	2.435	2.435	1.001e-05
NM_005950	MT1G	Homo sapiens metallothionein 1G (MT1G), mRNA [NM_005950]	chr16	2.45	2.45	1.046e-05
NM_016270	KLF2	Homo sapiens Kruppel-like factor 2 (lung) (KLF2), mRNA [NM_016270]	chr19	2.194	2.194	1.382e-05
NM_001964	EGR1	Homo sapiens early growth response 1 (EGR1), mRNA [NM_001964]	chr5	2.046	2.046	1.630e-05
NM_001781	CD69	Homo sapiens CD69 molecule (CD69), transcript variant 1, mRNA [NM_001781]	chr12	2.261	2.261	1.630e-05
NM_003637	ITGA10	Homo sapiens integrin, alpha 10 (ITGA10), mRNA [NM_003637]	chr1	2.351	2.351	1.630e-05
NM_006890	CEACAM7	Homo sapiens carcinoembryonic antigen-related cell adhesion molecule 7 (CEACAM7), mRNA [NM_006890]	chr19	2.242	2.242	2.198e-05
NM_001032998	KYNU	Homo sapiens kynureninase (KYNU), transcript variant 2, mRNA [NM_001032998]	chr2	2.55	2.55	2.780e-05
NM_015364	LY96	Homo sapiens lymphocyte antigen 96 (LY96), transcript variant 1, mRNA [NM_015364]	chr8	2.288	2.288	2.822e-05
NM_001007595	C2CD4B	Homo sapiens C2 calcium-dependent domain containing 4B (C2CD4B), mRNA [NM_001007595]	chr15	2.158	2.158	4.541e-05
NM_001012633	IL32	Homo sapiens interleukin 32 (IL32), transcript variant 4, mRNA [NM_001012633]	chr16	2.375	2.375	4.541e-05
NM_000735	CGA	Homo sapiens glycoprotein hormones, alpha polypeptide (CGA), transcript variant 2, mRNA [NM_000735]	chr6	2.257	2.257	4.982e-05
NM_001561	TNFRSF9	Homo sapiens tumor necrosis factor receptor superfamily, member 9 (TNFRSF9), mRNA [NM_001561]	chr1	2.137	2.137	7.494e-05
NM_001040058	SPP1	Homo sapiens secreted phosphoprotein 1 (SPP1), transcript variant 1, mRNA [NM_001040058]	chr4	2.233	2.233	8.904e-05
NM_000517	HBA2	Homo sapiens hemoglobin, alpha 2 (HBA2), mRNA [NM_000517]	chr16	2.099	2.099	8.904e-05
NM_018689	KIAA1199	Homo sapiens KIAA1199 (KIAA1199), mRNA [NM_018689]	chr15	2.003	2.003	1.152e-04
NM_005967	NAB2	Homo sapiens NGFI-A binding protein 2 (EGR1 binding protein 2) (NAB2), mRNA [NM_005967]	chr12	2.065	2.065	1.285e-04
NM_000700	ANXA1	Homo sapiens annexin A1 (ANXA1), mRNA [NM_000700]	chr9	2.828	2.828	1.511e-04
NM_018414	ST6GALNAC1	Homo sapiens ST6 (alpha-N-acetyl-neuraminyl-2,3-beta-galactosyl-1,3)-N-acetylgalactosaminide alpha-2,6-sialyltransferase 1 (ST6GALNAC1), mRNA [NM_018414]	chr17	2.103	2.103	1.857e-04
NM_000584	IL8	Homo sapiens interleukin 8 (IL8), mRNA [NM_000584]	chr4	4.124	4.124	2.973e-04
NM_003254	TIMP1	Homo sapiens TIMP metallopeptidase inhibitor 1 (TIMP1), mRNA [NM_003254]	chrX	2.024	2.024	3.950e-04
NM_173481	C19orf21	Homo sapiens chromosome 19 open reading frame 21 (C19orf21), mRNA [NM_173481]	chr19	2.002	2.002	5.890e-04
ENST00000416624	CD69	CD69 molecule [Source:HGNC Symbol;Acc:1694] [ENST00000416624]	chr12	2.084	2.084	9.105e-04
NM_005209	CRYBA2	Homo sapiens crystallin, beta A2 (CRYBA2), transcript variant 1, mRNA [NM_005209]	chr2	0.434	-2.306	9.608e-04
NM_007329	DMBT1	Homo sapiens deleted in malignant brain tumors 1 (DMBT1), transcript variant 2, mRNA [NM_007329]	chr10	0.498	-2.01	1.345e-03
NM_002341	LTB	Homo sapiens lymphotoxin beta (TNF superfamily, member 3) (LTB), transcript variant 1, mRNA [NM_002341]	chr6	2.481	2.481	2.042e-03
NR_004388	SCARNA14	Homo sapiens small Cajal body-specific RNA 14 (SCARNA14), guide RNA [NR_004388]	chr15	0.499	-2.004	3.639e-03
NM_144777	SCEL	Homo sapiens sciellin (SCEL), transcript variant 1, mRNA [NM_144777]	chr13	2.164	2.164	4.612e-03
NM_003225	TFF1	Homo sapiens trefoil factor 1 (TFF1), mRNA [NM_003225]	chr21	2.001	2.001	9.641e-03
NM_018974	UNC93A	Homo sapiens unc-93 homolog A (C. elegans) (UNC93A), transcript variant 1, mRNA [NM_018974]	chr6	2.129	2.129	1.165e-02
NM_005562	LAMC2	Homo sapiens laminin, gamma 2 (LAMC2), transcript variant 1, mRNA [NM_005562]	chr1	2.21	2.21	1.172e-02
NR_003021	SNORA79	Homo sapiens small nucleolar RNA, H/ACA box 79 (SNORA79), small nucleolar RNA [NR_003021]	chr14	0.493	-2.028	1.363e-02
NM_172364	CACNA2D4	Homo sapiens calcium channel, voltage-dependent, alpha 2/delta subunit 4 (CACNA2D4), mRNA [NM_172364]	chr12	0.468	-2.138	4.743e-02
NM_004963	GUCY2C	Homo sapiens guanylate cyclase 2C (heat stable enterotoxin receptor) (GUCY2C), mRNA [NM_004963]	chr12	2.452	2.452	4.938e-02

## Sheet: MES C29 treated vs vehicle
feature.ID	GeneSymbol	Description	Chr	Ratio	FC	Adj.P.value
NM_001611	ACP5	Homo sapiens acid phosphatase 5, tartrate resistant (ACP5), transcript variant 4, mRNA [NM_001611]	chr19	4.55	4.55	1.700e-11
NM_003820	TNFRSF14	Homo sapiens tumor necrosis factor receptor superfamily, member 14 (TNFRSF14), mRNA [NM_003820]	chr1	4.129	4.129	4.182e-09
NM_014391	ANKRD1	Homo sapiens ankyrin repeat domain 1 (cardiac muscle) (ANKRD1), mRNA [NM_014391]	chr10	2.733	2.733	1.967e-07
NM_016651	DACT1	Homo sapiens dapper, antagonist of beta-catenin, homolog 1 (Xenopus laevis) (DACT1), transcript variant 1, mRNA [NM_016651]	chr14	0.381	-2.626	2.100e-07
NM_002284	KRT86	Homo sapiens keratin 86 (KRT86), mRNA [NM_002284]	chr12	2.949	2.949	2.964e-07
NM_033306	CASP4	Homo sapiens caspase 4, apoptosis-related cysteine peptidase (CASP4), transcript variant gamma, mRNA [NM_033306]	chr11	2.417	2.417	8.111e-07
NM_001126106	SLC7A7	Homo sapiens solute carrier family 7 (amino acid transporter light chain, y+L system), member 7 (SLC7A7), transcript variant 3, mRNA [NM_001126106]	chr14	2.648	2.648	1.663e-06
NM_001040058	SPP1	Homo sapiens secreted phosphoprotein 1 (SPP1), transcript variant 1, mRNA [NM_001040058]	chr4	3.107	3.107	1.753e-06
NM_032432	ABLIM2	Homo sapiens actin binding LIM protein family, member 2 (ABLIM2), transcript variant 6, mRNA [NM_032432]	chr4	2.155	2.155	1.972e-06
NM_001145033	C11orf96	Homo sapiens chromosome 11 open reading frame 96 (C11orf96), mRNA [NM_001145033]	chr11	2.474	2.474	2.413e-06
NM_000148	FUT1	Homo sapiens fucosyltransferase 1 (galactoside 2-alpha-L-fucosyltransferase, H blood group) (FUT1), mRNA [NM_000148]	chr19	2.144	2.144	3.658e-06
NM_052966	FAM129A	Homo sapiens family with sequence similarity 129, member A (FAM129A), transcript variant 2, mRNA [NM_052966]	chr1	2.711	2.711	7.464e-06
NM_012098	ANGPTL2	Homo sapiens angiopoietin-like 2 (ANGPTL2), mRNA [NM_012098]	chr9	0.431	-2.322	7.464e-06
NM_021244	RRAGD	Homo sapiens Ras-related GTP binding D (RRAGD), mRNA [NM_021244]	chr6	2.325	2.325	8.235e-06
NM_006398	UBD	Homo sapiens ubiquitin D (UBD), mRNA [NM_006398]	chr6	2.405	2.405	8.542e-06
NM_001025195	CES1	Homo sapiens carboxylesterase 1 (CES1), transcript variant 1, mRNA [NM_001025195]	chr16	2.005	2.005	8.803e-06
NM_021158	TRIB3	Homo sapiens tribbles homolog 3 (Drosophila) (TRIB3), mRNA [NM_021158]	chr20	2.341	2.341	8.803e-06
NM_000041	APOE	Homo sapiens apolipoprotein E (APOE), mRNA [NM_000041]	chr19	2.327	2.327	9.439e-06
NM_001008211	OPTN	Homo sapiens optineurin (OPTN), transcript variant 1, mRNA [NM_001008211]	chr10	2.343	2.343	1.054e-05
NM_001005340	GPNMB	Homo sapiens glycoprotein (transmembrane) nmb (GPNMB), transcript variant 1, mRNA [NM_001005340]	chr7	2.369	2.369	1.058e-05
NM_006206	PDGFRA	Homo sapiens platelet-derived growth factor receptor, alpha polypeptide (PDGFRA), mRNA [NM_006206]	chr4	0.433	-2.307	1.265e-05
TCONS_l2_00005178	XLOC_l2_002761	BROAD Institute lincRNA (XLOC_l2_002761), lincRNA [TCONS_l2_00005178]	chr11	2.273	2.273	1.550e-05
NM_005950	MT1G	Homo sapiens metallothionein 1G (MT1G), mRNA [NM_005950]	chr16	2.311	2.311	2.525e-05
NM_019058	DDIT4	Homo sapiens DNA-damage-inducible transcript 4 (DDIT4), mRNA [NM_019058]	chr10	2.065	2.065	2.796e-05
NM_016113	TRPV2	Homo sapiens transient receptor potential cation channel, subfamily V, member 2 (TRPV2), mRNA [NM_016113]	chr17	2.12	2.12	3.258e-05
NM_001004431	METRNL	Homo sapiens meteorin, glial cell differentiation regulator-like (METRNL), mRNA [NM_001004431]	chr17	2.045	2.045	3.419e-05
NM_005502	ABCA1	Homo sapiens ATP-binding cassette, sub-family A (ABC1), member 1 (ABCA1), mRNA [NM_005502]	chr9	2.732	2.732	5.327e-05
NM_001172501	SLC6A2	Homo sapiens solute carrier family 6 (neurotransmitter transporter, noradrenalin), member 2 (SLC6A2), transcript variant 2, mRNA [NM_001172501]	chr16	2.217	2.217	7.342e-05
NM_153608	ZNF114	Homo sapiens zinc finger protein 114 (ZNF114), mRNA [NM_153608]	chr19	2.346	2.346	7.488e-05
NR_002442	SNORD18B	Homo sapiens small nucleolar RNA, C/D box 18B (SNORD18B), small nucleolar RNA [NR_002442]	chr15	0.487	-2.054	1.647e-04
NM_182507	KRT80	Homo sapiens keratin 80 (KRT80), transcript variant 1, mRNA [NM_182507]	chr12	2.02	2.02	1.729e-04
NM_016564	CEND1	Homo sapiens cell cycle exit and neuronal differentiation 1 (CEND1), mRNA [NM_016564]	chr11	2.128	2.128	2.076e-04
NM_000300	PLA2G2A	Homo sapiens phospholipase A2, group IIA (platelets, synovial fluid) (PLA2G2A), transcript variant 1, mRNA [NM_000300]	chr1	0.477	-2.097	2.498e-04
NM_001701	BAAT	Homo sapiens bile acid CoA: amino acid N-acyltransferase (glycine N-choloyltransferase) (BAAT), transcript variant 1, mRNA [NM_001701]	chr9	2.059	2.059	2.705e-04
ENST00000438158	XLOC_001215	601566084F1 NIH_MGC_21 Homo sapiens cDNA clone IMAGE:3840837 5', mRNA sequence [BE735115]	chr1	2.195	2.195	3.262e-04
NM_020455	GPR126	Homo sapiens G protein-coupled receptor 126 (GPR126), transcript variant a1, mRNA [NM_020455]	chr6	2.034	2.034	3.339e-04
NM_005214	CTLA4	Homo sapiens cytotoxic T-lymphocyte-associated protein 4 (CTLA4), transcript variant 1, mRNA [NM_005214]	chr2	0.499	-2.004	3.412e-04
NM_001011709	PNLIPRP3	Homo sapiens pancreatic lipase-related protein 3 (PNLIPRP3), mRNA [NM_001011709]	chr10	2.012	2.012	3.704e-04
NM_019851	FGF20	Homo sapiens fibroblast growth factor 20 (FGF20), mRNA [NM_019851]	chr8	0.478	-2.094	4.013e-04
NM_024111	CHAC1	Homo sapiens ChaC, cation transport regulator homolog 1 (E. coli) (CHAC1), transcript variant 1, mRNA [NM_024111]	chr15	2.116	2.116	4.283e-04
NM_003018	SFTPC	Homo sapiens surfactant protein C (SFTPC), transcript variant 1, mRNA [NM_003018]	chr8	0.459	-2.18	4.348e-04
NM_201649	SLC6A9	Homo sapiens solute carrier family 6 (neurotransmitter transporter, glycine), member 9 (SLC6A9), transcript variant 2, mRNA [NM_201649]	chr1	2.025	2.025	4.504e-04
NM_001032998	KYNU	Homo sapiens kynureninase (KYNU), transcript variant 2, mRNA [NM_001032998]	chr2	2.065	2.065	4.504e-04
NM_003381	VIP	Homo sapiens vasoactive intestinal peptide (VIP), transcript variant 1, mRNA [NM_003381]	chr6	0.45	-2.224	8.696e-04
NM_004347	CASP5	Homo sapiens caspase 5, apoptosis-related cysteine peptidase (CASP5), transcript variant a, mRNA [NM_004347]	chr11	2.147	2.147	2.230e-03
NM_001165	BIRC3	Homo sapiens baculoviral IAP repeat containing 3 (BIRC3), transcript variant 1, mRNA [NM_001165]	chr11	2.156	2.156	2.255e-03
NM_004591	CCL20	Homo sapiens chemokine (C-C motif) ligand 20 (CCL20), transcript variant 1, mRNA [NM_004591]	chr2	2.074	2.074	3.767e-03
NM_004163	RAB27B	Homo sapiens RAB27B, member RAS oncogene family (RAB27B), mRNA [NM_004163]	chr18	2.114	2.114	4.120e-03
NM_001926	DEFA6	Homo sapiens defensin, alpha 6, Paneth cell-specific (DEFA6), mRNA [NM_001926]	chr8	0.394	-2.537	5.814e-03
NM_004131	GZMB	Homo sapiens granzyme B (granzyme 2, cytotoxic T-lymphocyte-associated serine esterase 1) (GZMB), mRNA [NM_004131]	chr14	0.487	-2.054	6.767e-03
ENST00000431460	XLOC_013787	BROAD Institute lincRNA (XLOC_013787), lincRNA [TCONS_00028062]	chr20	0.494	-2.022	4.338e-02
NR_003285	RN5-8S1	Homo sapiens RNA, 5.8S ribosomal 1 (RN5-8S1), ribosomal RNA [NR_003285]	chrUn_gl000220	0.432	-2.313	4.367e-02
